# Supplementary material for: Biovera-Epi: A new database on species diversity, community composition and leaf functional traits of vascular epiphytes along gradients of elevation and forest-use intensity in Mexico
Source: Biodivers Data J. 2021 Oct 7;9:e71974. doi: 10.3897/BDJ.9.e71974 (PMC8516827; doi:10.3897/BDJ.9.e71974)
Supplement: Supplementary material 2 — Distribution table [file bdj-09-e71974-s002.csv]

Plot_ID	Sp.code	Frequency.subplots	JZone1	JZone2a	JZone2b	JZone3	JZone4	JZone5	Frequency.J.zones
CaO3	Acinbarkeri	0	0	0	0	0	1	0	1
PaS2	Aechbractea	0	0	0	0	0	1	0	1
PaO3	Aechbractea	0	0	0	0	1	0	0	1
PaO4	Aechbractea	0	0	0	0	1	0	0	1
PaO5	Aechbractea	0	0	0	0	1	0	0	1
ZaO5	Anthandicol	0	0	0	0	1	0	0	1
ZaS1	Anthandicol	0	0	0	1	1	1	0	3
PaS1	Anthpodophy	0	1	1	1	1	0	0	4
CaO1	Anthscanden	0	0	0	0	1	0	0	1
ZaS1	Anthscanden	0	0	0	1	1	0	0	2
PaO2	Anthschlech	0	0	0	0	0	1	0	1
PaD3	Anthschlech	0	0	1	0	0	0	0	1
PaS5	Anthschlech	0	0	1	0	0	0	0	1
CaO2	Asplcuspida	0	0	0	1	0	0	0	1
ZaD4	Asplcuspida	0	0	0	1	1	0	0	2
EnS4	Asplmonanth	0	1	0	0	0	0	0	1
PaD2	Brascuculla	0	0	0	0	1	0	0	1
PaS1	Brascuculla	0	0	0	0	1	0	0	1
PaD4	Brascuculla	0	0	0	0	0	1	1	2
PaO2	Brasnodosa	0	0	0	0	1	0	0	1
PaO5	Brasnodosa	0	0	0	0	1	0	0	1
PaD4	Brasverruco	0	0	0	0	0	1	0	1
PaS1	Brasverruco	0	0	0	0	1	1	0	2
PaS3	Brasverruco	0	0	0	1	1	1	0	3
PaO1	Camadensum	0	0	0	0	1	0	0	1
EnD2	Campamphost	0	0	0	1	0	0	0	1
EnO4	Campamphost	0	0	1	0	0	0	0	1
EnO1	Campamphost	0	0	1	1	0	0	0	2
CaO3	Campangusti	0	0	0	0	1	0	0	1
EnD5	Campangusti	0	0	0	1	0	0	0	1
ChD5	Campphyllit	0	0	0	0	1	0	0	1
PaO5	Campphyllit	0	0	0	0	1	0	0	1
PaO1	Campphyllit	0	0	0	1	0	0	0	1
ChD4	Catainteger	0	0	0	1	0	0	0	1
ChD3	Catainteger	0	0	1	0	0	0	0	1
ZaD5	Cato2000sp1	0	0	0	0	1	0	0	1
PaD2	Catomorreni	0	0	0	1	1	1	1	4
CaO4	Catonitida	0	0	0	0	0	1	0	1
CaO1	Catonitida	0	0	0	0	1	0	0	1
CaO3	Catonitida	0	0	0	0	1	1	0	2
CaO5	Catonitida	0	0	0	0	1	1	0	2
PaS1	Catosessili	0	0	0	1	0	0	0	1
PaO5	Catosessili	0	0	0	0	1	1	1	3
PaD3	Catosessili	0	0	1	0	1	1	0	3
PaD4	Catosessili	0	0	1	1	1	0	0	3
PaD1	Catosessili	0	0	0	1	1	1	1	4
EnD2	Cochlineari	0	0	0	1	0	0	0	1
ZaO5	Cochlineari	0	0	1	0	0	0	0	1
ZaS2	Cochlineari	0	1	0	0	0	0	0	1
EnD1	Cochlineari	0	0	0	1	1	0	0	2
CaO2	Compfalcata	0	0	0	0	0	1	0	1
CaS1	Compfalcata	0	0	0	0	1	0	0	1
EnO5	Dendarboreu	0	0	0	0	0	1	0	1
ZaS1	Dendarboreu	0	0	0	0	0	1	0	1
ZaS3	Dendarboreu	0	0	0	0	0	1	0	1
EnS1	Dendarboreu	0	0	0	0	1	0	0	1
EnS4	Dendarboreu	0	0	0	1	0	0	0	1
EnO1	Dendarboreu	0	0	1	0	0	0	0	1
ZaO4	Dendarboreu	0	0	0	0	0	1	1	2
ZaO3	Dendarboreu	0	0	0	0	1	1	0	2
EnS5	Dendarboreu	0	0	0	1	1	0	0	2
CaO1	Didyreptans	0	0	0	1	0	0	0	1
ZaO4	Disoflagell	0	0	0	0	0	1	0	1
ZaS4	Disoflagell	0	0	0	0	1	0	0	1
ZaO3	Disophyllan	0	0	0	0	1	0	0	1
ZaO4	Disophyllan	0	0	0	0	1	0	0	1
ZaS1	Disophyllan	0	0	0	0	1	1	1	3
ZaS1	Elapglaucum	0	0	0	0	0	1	0	1
ZaS2	Elapglaucum	0	0	0	0	1	0	0	1
EnD1	Elapglaucum	0	0	0	1	0	0	0	1
CaO5	Elapglaucum	0	0	0	1	1	1	0	3
EnO1	Elappaleace	0	1	0	0	0	0	0	1
CaO1	Elappeltatu	0	0	1	0	0	0	0	1
CaO3	Elappeltatu	0	0	0	1	1	0	0	2
ZaO4	Elappetiola	0	0	0	0	0	1	0	1
ZaO2	Elappetiola	0	0	0	0	1	0	0	1
CaO1	Elapsartori	0	0	0	0	0	1	0	1
EnD3	Elapsartori	0	0	0	0	1	0	0	1
EnO2	Elapsartori	0	0	0	0	1	0	0	1
EnO1	Elapsartori	0	0	0	1	0	0	0	1
ZaO2	Elapsartori	0	0	1	0	0	0	0	1
ZaO5	Elapsartori	0	0	1	0	0	0	0	1
EnO3	Elapsartori	0	0	0	0	1	1	0	2
ZaO3	Elapsartori	0	0	0	1	1	0	0	2
ZaD5	Elapsartori	0	1	0	1	0	0	0	2
EnD2	Elapsartori	0	0	1	1	1	0	0	3
CaO5	Elapvestitu	0	0	0	0	0	1	0	1
ZaD3	Elapvestitu	0	0	0	1	0	0	0	1
PaO4	Elle500sp1	0	0	0	0	1	0	0	1
PaS1	Epid500sp1	0	0	0	0	1	0	0	1
PaS3	Epid500sp1	0	0	0	1	0	0	0	1
PaD3	Epidnocturn	0	0	0	0	1	0	0	1
PaD2	Epidranifer	0	0	0	0	0	1	0	1
PaD3	Epidranifer	0	0	0	1	0	0	0	1
EnO3	Epip2500sp1	0	0	0	0	1	0	0	1
EnO2	Epip2500sp1	0	0	0	1	1	0	0	2
ChO1	Epipphyllan	0	0	0	0	0	1	0	1
PaO2	Epipphyllan	0	0	0	0	0	1	0	1
PaS2	Epipphyllan	0	0	0	0	0	1	0	1
ChS4	Epipphyllan	0	0	0	0	1	0	0	1
PaO5	Epipphyllan	0	0	0	0	1	0	0	1
ZaS1	Eric2500sp1	0	0	0	0	0	1	0	1
EnO4	Eric2500sp1	0	0	0	0	1	0	0	1
ZaO5	Eric2500sp1	0	0	0	0	1	0	0	1
ZaS4	Eric2500sp1	0	0	0	0	1	0	0	1
EnD3	Eric2500sp1	0	0	0	1	0	0	0	1
EnO3	Eric2500sp1	0	0	0	1	0	0	0	1
ZaO3	Eric2500sp1	0	0	0	1	0	0	0	1
EnS4	Eric2500sp1	0	0	0	1	1	0	0	2
ZaO4	Eric2500sp1	0	0	0	0	1	1	1	3
ZaS5	Galadelicat	0	0	0	1	1	0	0	2
ChD5	Gonifurfura	0	0	0	0	1	0	0	1
ChO1	Gonifurfura	0	0	0	0	1	0	0	1
PaO1	Gonifurfura	0	0	0	0	1	0	0	1
ChO5	Gonifurfura	0	0	0	1	0	1	0	2
ChO3	Gonifurfura	0	0	0	1	1	0	0	2
CaD1	Gonifurfura	0	0	1	0	1	0	0	2
ZaD4	Hupecuernav	0	0	0	0	1	0	0	1
ZaO4	Hupepringle	0	0	0	0	0	1	0	1
CaO1	Hupetaxifol	0	0	0	0	1	0	0	1
CaO3	Hupetaxifol	0	0	0	0	1	0	0	1
CaS2	Hupetaxifol	0	1	0	0	0	0	0	1
PaD3	Hyloundatus	0	0	0	0	0	1	0	1
EnO3	Hymefucoide	0	1	0	0	0	0	0	1
EnS1	Hymefucoide	0	1	0	0	0	0	0	1
EnD1	Hymefucoide	0	1	1	0	0	0	0	2
CaO1	Hymepolyant	0	0	0	1	0	0	0	1
ZaO5	Hymepolyant	0	1	1	0	0	0	0	2
ZaD2	Hymetegular	0	1	0	0	0	0	0	1
CaO2	Isoc1500sp1	0	0	0	0	1	0	0	1
ZaO5	Isocunilate	0	0	0	0	0	1	0	1
ZaO1	Isocunilate	0	0	0	0	1	0	0	1
ZaO3	Isocunilate	0	0	0	1	0	0	0	1
ZaD3	Isocunilate	0	0	0	1	1	1	0	3
PaO3	Laelanceps	0	1	0	0	0	0	0	1
ZaS5	Leph2000sp1	0	0	0	0	1	0	0	1
ZaO4	Leph2000sp1	0	1	0	0	0	0	0	1
MaS5	Lygovenustu	0	0	1	0	0	0	0	1
EnD3	Maiapanicul	0	0	0	0	0	1	0	1
EnD2	Maiapanicul	0	0	0	0	1	0	0	1
EnO2	Maiapanicul	0	0	0	0	1	0	0	1
EnD4	Maiapanicul	0	0	1	0	0	0	0	1
ZaS1	Maiapanicul	0	1	0	0	0	0	0	1
EnO3	Maiapanicul	0	0	0	1	1	1	0	3
ZaD3	Maxi2000sp1	0	0	0	0	1	0	0	1
ZaD4	Maxi2000sp1	0	0	0	1	0	0	0	1
PaO5	Maxitenuifo	0	0	0	0	0	1	0	1
CaO4	Melpleptost	0	0	0	0	1	0	0	1
CaO1	Melppilosis	0	0	0	0	1	0	0	1
EnO3	Melpxiphopt	0	0	0	1	0	0	0	1
CaO5	Melpxiphopt	0	0	1	0	1	0	0	2
PaS2	Micrnitida	0	1	0	0	0	0	0	1
PaS4	Micrnitida	0	0	0	1	1	0	0	2
PaO2	Monsacumina	0	0	1	0	1	1	0	3
PaO5	Monsacumina	0	0	1	1	1	0	0	3
MaD2	Myrmtibicin	0	0	0	0	1	1	0	2
ZaS4	Nelstapianu	0	0	0	0	1	0	0	1
EnD1	Nelstapianu	0	0	0	1	0	0	0	1
EnD5	Nelstapianu	0	0	0	1	0	0	0	1
EnO5	Nelstapianu	0	0	0	1	0	0	0	1
EnS4	Nelstapianu	0	0	0	1	0	0	0	1
CaO3	Onci1500sp1	0	0	0	0	1	0	0	1
PaO5	Onci500sp1	0	0	1	0	0	0	0	1
ZaD2	Onciincurvu	0	0	0	0	1	0	0	1
EnS1	Oreocapitat	0	0	0	0	1	0	0	1
ZaD3	Oreocapitat	0	0	0	0	1	0	0	1
ZaS2	Oreocapitat	0	0	0	0	1	0	0	1
ZaS5	Oreocapitat	0	0	0	0	1	0	0	1
ChS4	Orniinflexu	0	0	0	0	1	0	0	1
ChS1	Orniinflexu	0	0	0	1	0	0	0	1
EnD1	Pecl2500sp1	0	0	0	1	1	1	0	3
EnD3	Pecl2500sp1	0	0	0	1	1	1	0	3
ChO1	Pecldispers	0	0	0	0	1	0	0	1
ChD2	Pecldispers	0	0	1	0	0	0	0	1
PaO3	Pecldivaric	0	0	0	1	0	0	0	1
ZaS1	Peclhartweg	0	0	0	0	1	0	0	1
EnD1	Peclhartweg	0	0	0	1	0	0	0	1
ZaO2	Peclhartweg	0	0	1	0	0	0	0	1
ZaS5	Peclhartweg	0	0	0	1	1	1	0	3
EnO3	Peclliebman	0	0	0	0	0	1	0	1
EnD3	Peclliebman	0	0	0	0	1	0	0	1
EnD4	Peclliebman	0	0	0	0	1	0	0	1
EnS1	Peclliebman	0	0	0	0	1	0	0	1
EnO1	Peclliebman	0	1	1	0	0	0	0	2
EnO5	Peclliebman	0	0	1	1	1	0	0	3
CaO5	Peclplumula	0	0	0	0	0	1	0	1
CaO1	Peclplumula	0	0	0	0	1	0	0	1
CaS2	Peclplumula	0	0	0	0	1	0	0	1
EnD4	Pepe2500sp1	0	1	1	0	1	0	0	3
PaD2	Pepe500sp1	0	0	0	0	0	1	0	1
PaD2	Pepe500sp2	0	0	0	0	0	1	0	1
CaS4	Pepearboric	0	0	0	0	1	0	0	1
ZaO3	Pepearboric	0	0	0	1	0	0	0	1
CaS5	Pepearboric	0	0	0	1	0	0	0	1
ZaO5	Pepearboric	0	1	0	0	0	0	0	1
CaS2	Pepearboric	0	1	0	0	0	0	0	1
ZaD1	Pepearboric	0	0	0	1	1	0	0	2
CaD3	Pepeberland	0	0	1	0	0	0	0	1
PaS2	Pepeberland	0	0	0	0	1	1	0	2
CaD1	Pepeleptoph	0	0	1	0	0	0	0	1
EnS1	Pepeleptoph	0	1	0	0	0	0	0	1
ZaO2	Pepeleptoph	0	1	0	0	0	0	0	1
CaS2	Pepeleptoph	0	1	0	0	0	0	0	1
ZaO4	Pepeleptoph	0	0	0	0	1	1	0	2
CaD4	Pepeleptoph	0	0	0	1	1	0	0	2
EnD1	Pepeleptoph	0	1	0	0	1	0	0	2
CaO1	Pepequadrif	0	0	0	0	0	1	0	1
CaO2	Pepequadrif	0	0	0	0	0	1	0	1
PaD1	Pepequadrif	0	0	0	0	1	0	0	1
CaD2	Pepequadrif	0	0	0	1	0	0	0	1
CaD3	Pepequadrif	0	0	1	0	0	0	0	1
CaD5	Pepequadrif	0	0	0	1	1	0	0	2
ZaO3	Pepequadrif	0	1	0	1	1	1	0	4
ZaS1	Pepequadrif	0	1	0	1	1	1	1	5
EnD1	Pepesanjose	0	0	0	1	0	0	0	1
EnO2	Pepetenerri	0	1	0	0	0	0	0	1
ZaD3	Pepetenerri	0	1	0	0	0	0	0	1
ZaO3	Pepetenerri	0	1	0	0	0	0	0	1
ZaO5	Pepetenerri	0	1	0	0	0	0	0	1
ZaS1	Pepetenerri	0	1	0	0	0	0	0	1
EnO1	Pepetenerri	0	1	1	0	0	0	0	2
EnD2	Pepetenerri	0	1	0	1	1	0	0	3
ChO2	Pepetetraph	0	0	0	0	1	0	0	1
CaO5	Philadvena	0	0	0	0	1	0	0	1
ZaO5	Phleareolat	0	0	0	0	1	0	0	1
CaD3	Phleareolat	0	0	1	0	0	0	0	1
ZaD4	Phleareolat	0	0	0	0	1	1	0	2
CaS3	Phleareolat	0	0	0	0	1	1	0	2
CaD2	Phleareolat	0	0	0	1	1	1	0	3
EnO4	Phlepringle	0	0	0	0	1	0	0	1
EnD1	Phlepringle	0	0	0	1	0	0	0	1
ZaO4	Phlepseudoa	0	0	0	0	0	1	0	1
CaD4	Phlepseudoa	0	0	0	0	0	1	0	1
ZaD5	Phlepseudoa	0	0	0	0	1	0	0	1
CaO1	Phlepseudoa	0	0	0	0	1	0	0	1
CaO4	Phlepseudoa	0	0	0	0	1	0	0	1
ZaO3	Phlepseudoa	0	0	0	0	1	1	0	2
CaD1	Phlepseudoa	0	0	0	0	1	1	0	2
ZaS1	Pingmoranen	0	0	0	0	1	0	0	1
EnO2	Pingmoranen	0	1	0	0	0	0	0	1
EnO3	Pingmoranen	0	1	0	0	0	0	0	1
EnD1	Pingmoranen	0	0	1	1	1	0	0	3
ChS5	Pleoacicula	0	0	0	1	1	0	0	2
CaO4	Pleoangusta	0	0	1	0	0	0	0	1
ZaS1	Pleocrassin	0	0	0	0	0	1	0	1
ZaD1	Pleocrassin	0	1	0	0	0	0	0	1
ZaD4	Pleocrassin	0	0	0	0	1	1	0	2
ChS4	Pleocrassin	0	0	0	1	1	0	0	2
ZaO3	Pleomexican	0	0	0	0	1	0	0	1
CaS1	Pleomexican	0	0	0	0	1	0	0	1
CaO1	Pleomexican	0	0	0	1	0	0	0	1
CaS5	Pleomexican	0	1	0	0	0	0	0	1
ZaD3	Pleomexican	0	0	0	1	1	0	0	2
CaO2	Pleomexican	0	0	0	1	1	0	0	2
ZaO2	Pleomexican	0	0	1	1	0	0	0	2
ZaO4	Pleomexican	0	0	0	0	1	1	1	3
EnO5	Pleop.inter	0	0	0	1	1	1	0	3
CaO1	Pleoplebeia	0	0	0	0	1	0	0	1
CaO5	Pleoplebeia	0	0	0	1	0	0	0	1
CoD1	Pleoplebeia	0	0	1	0	0	0	0	1
CoS3	Pleoplebeia	0	0	1	0	0	0	0	1
CoD2	Pleoplebeia	0	1	0	0	0	0	0	1
CoO1	Pleoplebeia	0	1	0	0	0	0	0	1
CoO3	Pleoplebeia	0	1	0	0	0	0	0	1
CoS1	Pleoplebeia	0	1	0	0	0	0	0	1
CoS2	Pleoplebeia	0	1	0	0	0	0	0	1
CoS4	Pleoplebeia	0	1	0	0	0	0	0	1
EnD5	Pleoplebeia	0	1	0	0	0	0	0	1
CaD2	Pleoplebeia	0	1	0	0	1	0	0	2
CoD5	Pleopolylep	0	0	1	0	0	0	0	1
CoO1	Pleopolylep	0	0	1	0	0	0	0	1
CoO2	Pleopolylep	0	0	1	0	0	0	0	1
CoD1	Pleopolylep	0	1	0	0	0	0	0	1
CoD2	Pleopolylep	0	1	0	0	0	0	0	1
CoD4	Pleopolylep	0	1	0	0	0	0	0	1
CoO4	Pleopolylep	0	1	0	0	0	0	0	1
CoO5	Pleopolylep	0	1	0	0	0	0	0	1
ZaS1	Pleu2000sp1	0	0	0	0	0	1	0	1
PaS5	Pleu500sp1	0	0	0	0	1	0	0	1
CaO2	Pleupachygl	0	0	1	0	0	0	0	1
EnD3	Polycf.frat	0	0	0	0	1	1	0	2
PaO5	Polyfurfura	0	0	0	0	0	1	0	1
ChO3	Polyfurfura	0	0	0	0	1	0	0	1
PaD4	Polyfurfura	0	0	0	0	1	0	0	1
PaS2	Polyfurfura	0	0	0	0	1	0	0	1
PaD3	Polyfurfura	0	0	0	1	1	0	0	2
PeD2	Polyhartweg	0	1	0	0	0	0	0	1
PeS5	Polyhartweg	0	1	0	0	0	0	0	1
CaO3	Polylepidot	0	0	0	0	1	0	0	1
CaD2	Polylineatu	0	0	1	0	0	0	0	1
CaS3	Polyplebeiu	0	0	0	0	0	1	0	1
EnS4	Polyplebeiu	0	0	1	0	0	0	0	1
ChO4	Polyplebeiu	0	0	0	1	1	0	0	2
ChD5	Polyplebeiu	0	0	1	1	0	0	0	2
EnD1	Polyplebeiu	0	0	1	1	0	1	0	3
ZaO4	Polyplebeiu	0	0	1	1	1	1	1	5
ZaO4	Polyplesios	0	0	0	0	0	1	0	1
EnO5	Polyplesios	0	0	0	0	1	0	0	1
ZaO5	Polyplesios	0	1	0	0	0	0	0	1
EnS5	Polyplesios	0	0	0	0	1	1	0	2
MaO1	Polypolypod	0	0	0	0	0	1	0	1
CaO1	Polypolypod	0	0	0	0	1	0	0	1
EnD3	Polypuberul	0	0	0	0	1	0	0	1
CaS1	Polypuberul	0	0	0	0	1	0	0	1
ZaO3	Polypuberul	0	1	0	0	0	0	0	1
EnD1	Polypuberul	0	0	0	1	1	0	0	2
ZaS3	Polypuberul	0	0	1	1	0	0	0	2
CaO5	Polythyssan	0	0	0	0	1	0	0	1
PaD3	Prosradiata	0	0	0	0	0	1	0	1
EnD3	Prosvaricos	0	0	0	0	0	1	0	1
ZaO2	Prosvaricos	0	0	0	1	0	0	0	1
EnD1	Prosvitelli	0	0	0	0	0	1	0	1
ZaD1	Prosvitelli	0	0	0	0	1	0	0	1
CaS3	Prosvitelli	0	0	0	0	1	0	0	1
EnD4	Prosvitelli	0	0	0	1	0	0	0	1
EnD2	Prosvitelli	0	0	0	0	1	1	0	2
ZaO3	Prosvitelli	0	0	0	0	1	1	0	2
ZaS1	Psilcomplan	0	0	0	1	0	0	0	1
PaD4	Rhipbaccife	0	0	0	0	0	1	0	1
PaO5	Rhipbaccife	0	0	0	0	0	1	0	1
PaO3	Rhipbaccife	0	0	0	0	1	0	0	1
ChO5	Rhipbaccife	0	0	0	1	0	0	0	1
PaS2	Rhipbaccife	0	0	0	0	1	1	0	2
EnD2	Rhyn2500sp1	0	0	0	1	0	0	0	1
EnO5	Rhyn2500sp1	0	0	0	1	1	0	0	2
ZaD2	Rhyncordata	0	0	0	0	1	0	0	1
ZaO3	Rhyncordata	0	0	0	0	1	0	0	1
ZaO4	Rhynehrenbe	0	0	0	0	0	1	0	1
ZaS1	Rhynehrenbe	0	0	0	0	0	1	0	1
EnD4	Rhynehrenbe	0	0	0	1	0	0	0	1
EnO3	Rhynehrenbe	0	0	0	1	1	0	0	2
ChD4	Scap1000sp1	0	0	0	0	1	0	0	1
ChO2	Scap1000sp1	0	0	0	0	1	0	0	1
PaD2	Scap500sp1	0	0	0	0	1	1	0	2
EnO5	Scolensifor	0	0	0	0	1	0	0	1
EnO3	Scolensifor	0	0	1	1	0	0	0	2
EnD2	Sedubotteri	0	0	0	0	1	0	0	1
EnO4	Sedubotteri	0	0	0	0	1	0	0	1
EnO5	Sedubotteri	0	0	0	1	1	0	0	2
EnD5	Sedubotteri	0	1	1	0	0	0	0	2
EnD4	Sedubotteri	0	1	1	1	0	0	0	3
PaD2	Sele500sp1	0	0	0	1	0	0	0	1
PaD3	Sele500sp2	0	0	1	0	1	0	0	2
MaO1	Selegrandif	0	0	0	0	1	0	0	1
PaD3	Selegrandif	0	0	0	0	1	0	0	1
PaD2	Seletestudo	0	0	0	0	1	0	0	1
PaD4	Seletestudo	0	0	0	0	1	0	0	1
CaD5	Serpfalcari	0	0	0	0	1	0	0	1
CaO3	Serpfalcari	0	0	0	0	1	0	0	1
ZaD5	Serpfalcari	0	0	1	0	0	0	0	1
CaO5	Serpfalcari	0	0	0	1	1	0	0	2
ZaO3	Serpfalcari	0	1	0	1	0	0	0	2
PaS2	Serptriseri	0	0	0	0	1	0	0	1
EnS1	Sola2500sp1	0	0	0	0	1	0	0	1
ZaS1	Spec2000sp1	0	0	0	0	1	1	0	2
PaO2	Spec500sp1	0	0	0	1	0	0	0	1
PaD2	Specgrobyi	0	0	0	0	1	0	0	1
PaD2	Spectribulo	0	0	0	0	1	1	0	2
CaS1	Stel1500sp1	0	0	0	0	0	1	0	1
PaO5	Stelemargin	0	0	0	1	0	0	0	1
ZaO1	Steloaxacan	0	0	0	0	1	0	0	1
ChO2	Stelpachygl	0	0	0	0	1	0	0	1
PaO2	Syngneglect	0	0	0	0	1	0	0	1
PaS2	Syngneglect	0	0	0	0	1	0	0	1
ChO5	Syngneglect	0	0	0	1	0	0	0	1
ChO4	Syngneglect	0	0	0	1	1	0	0	2
ChS3	Till1000sp1	0	0	0	0	1	0	0	1
ZaO1	Till2000sp1	0	1	0	0	0	0	0	1
ZaS1	Till2000sp1	0	0	0	0	0	1	1	2
ZaO4	Till2000sp1	0	0	1	0	1	0	1	3
ZaO3	Till2000sp1	0	0	0	1	1	1	0	3
EnD4	Till2500sp1	0	0	0	0	1	0	0	1
EnO2	Till2500sp2	0	0	0	1	1	0	0	2
PaD2	Tillbotteri	0	0	0	1	0	0	0	1
CaD1	Tillbutzii	0	0	0	0	1	0	0	1
MaO2	Tillconcolo	0	0	0	0	0	1	0	1
MaO4	Tillconcolo	0	0	0	0	0	1	0	1
MaD2	Tillconcolo	0	0	0	1	0	0	0	1
MaD1	Tillconcolo	0	1	0	1	1	0	0	3
ChS3	Tillfilifol	0	0	0	0	1	0	0	1
PaD3	Tillfilifol	0	0	0	0	1	0	0	1
ChS1	Tillfilifol	0	0	0	1	0	0	0	1
PaS2	Tillfoliosa	0	0	1	0	0	0	0	1
ZaS1	Tillgymnobo	0	0	0	0	0	1	0	1
EnS3	Tillgymnobo	0	0	0	0	1	0	0	1
ZaO3	Tillgymnobo	0	0	0	0	1	0	0	1
CaO5	Tillgymnobo	0	0	0	1	0	0	0	1
ZaS3	Tillgymnobo	0	0	0	0	1	1	0	2
ZaO4	Tillgymnobo	0	0	0	0	1	1	1	3
EnS4	Tillgymnobo	0	0	0	1	1	1	0	3
EnD3	Tillimperia	0	0	0	0	1	0	0	1
ZaO3	Tillimperia	0	0	0	0	1	0	0	1
ZaO4	Tillimperia	0	0	0	0	1	0	0	1
ZaO5	Tillimperia	0	0	0	0	1	0	0	1
EnO4	Tillimperia	0	0	0	0	1	1	0	2
EnS4	Tillimperia	0	0	0	1	1	0	0	2
MaO1	Tillionanth	0	0	0	0	0	1	0	1
PaS2	Tillionanth	0	0	0	0	1	1	0	2
PaD3	Tillionanth	0	0	1	0	1	0	0	2
MaS5	Tillionanth	0	0	1	1	0	1	0	3
PaD4	Tillionanth	0	0	1	1	1	0	0	3
PaS1	Tillionanth	0	0	1	1	1	1	0	4
CaD3	Tilljuncea	0	0	0	0	0	1	0	1
PaD2	Tilljuncea	0	0	0	0	1	0	0	1
PaO5	Tilljuncea	0	0	0	0	1	0	0	1
PaS5	Tilljuncea	0	0	0	0	1	0	0	1
CaO4	Tilljuncea	0	0	0	0	1	0	0	1
CaS1	Tilljuncea	0	0	0	0	1	0	0	1
PaD3	Tilljuncea	0	0	0	0	1	1	0	2
CaD4	Tilljuncea	0	0	0	0	1	1	0	2
PaD5	Tilljuncea	0	0	1	0	0	1	0	2
CaO4	Tillkirchho	0	0	0	0	1	1	0	2
ChD3	Tilllimbata	0	0	0	0	1	0	0	1
ChO4	Tilllimbata	0	0	0	0	1	0	0	1
PaD2	Tilllimbata	0	0	0	0	1	1	0	2
CaS2	Tilllucida	0	0	0	0	1	0	0	1
CaO4	Tillmacrope	0	0	0	0	1	0	0	1
CaD4	Tillmacrope	0	0	0	1	0	0	0	1
ZaS1	Tillmultica	0	0	0	0	0	1	0	1
ZaO3	Tillmultica	0	0	0	0	1	0	0	1
ZaS3	Tillmultica	0	0	0	0	1	0	0	1
CaO4	Tillmultica	0	0	0	0	1	0	0	1
ZaO4	Tillmultica	0	0	0	0	1	1	0	2
MaS3	Tillpaucifo	0	0	0	1	0	0	0	1
PaS1	Tillpolysta	0	0	0	0	0	1	0	1
ChD3	Tillpolysta	0	0	0	0	1	0	0	1
CaO4	Tillpunctul	0	0	0	0	0	1	0	1
PaD2	Tillpunctul	0	0	0	0	1	0	0	1
CaO1	Tillpunctul	0	0	0	0	1	0	0	1
CaO5	Tillpunctul	0	0	0	0	1	0	0	1
CaS5	Tillpunctul	0	0	0	1	0	0	0	1
PaO1	Tillpunctul	0	0	0	1	1	1	0	3
PaD3	Tillrecurva	0	0	0	0	1	0	0	1
PaO5	Tillrecurva	0	0	0	0	1	1	0	2
ChS5	Tillschiede	0	0	0	0	1	0	0	1
ChS3	Tillschiede	0	0	0	1	0	0	0	1
PaD1	Tillschiede	0	0	0	1	0	0	1	2
ChD3	Tillschiede	0	0	0	1	1	0	0	2
PaS5	Tillschiede	0	0	0	1	1	0	0	2
PaS1	Tillstrepto	0	0	0	0	1	0	0	1
PaS2	Tillstrepto	0	0	0	0	1	0	0	1
PaD5	Tillstrepto	0	0	0	0	1	1	0	2
PaS1	Tilltricolo	0	0	0	0	0	1	0	1
PaS1	Tillutricul	0	0	0	0	1	0	0	1
PaD4	Tillutricul	0	0	1	0	0	0	0	1
EnD1	Tillviolace	0	0	0	0	1	0	0	1
EnS2	Tillviolace	0	0	0	0	1	0	0	1
EnO5	Tillviolace	0	0	0	0	1	1	0	2
MaO5	Tric0sp1	0	0	0	0	1	0	0	1
MaS3	Tric0sp1	0	0	0	1	0	0	0	1
ChD3	Tric1000sp1	0	0	0	0	1	0	0	1
ChS3	Tric1000sp1	0	0	0	1	0	0	0	1
PaS5	Tric500sp1	0	0	0	0	0	1	0	1
PaO2	Tric500sp1	0	0	0	1	0	0	0	1
PaO3	Tricstramin	0	0	0	0	1	0	0	1
ZaO3	Vandradican	0	0	0	1	0	0	0	1
EnO3	Vittgramini	0	0	0	0	1	0	0	1
ZaD3	Vittgramini	0	0	0	1	0	0	0	1
EnD1	Vittgramini	0	1	0	0	0	0	0	1
EnD5	Vittgramini	0	1	0	0	0	0	0	1
EnS1	Vittgramini	0	1	0	0	0	0	0	1
ZaO3	Vittgramini	0	1	0	0	0	0	0	1
ZaS1	Vittgramini	0	1	1	0	1	1	0	4
ZaO4	Weravanhyni	0	0	0	1	0	0	0	1
PaD1	Aechbractea	1	0	0	0	0	0	0	0
PaD3	Aechbractea	1	0	0	0	0	0	0	0
PaD5	Aechbractea	1	0	0	0	0	0	0	0
PaS5	Aechbractea	1	0	0	0	0	0	0	0
MaD3	Aechbractea	1	0	0	1	0	0	0	1
PaD2	Aechnudicau	1	0	0	0	0	0	0	0
PaS2	Aechnudicau	1	0	0	0	0	0	0	0
ZaO2	Anthandicol	1	0	0	1	1	1	0	3
PaS3	Anthpodophy	1	1	0	0	0	0	0	1
PaD2	Anthscanden	1	0	0	0	0	0	0	0
ChO1	Anthschlech	1	0	0	0	0	0	0	0
ChO2	Anthschlech	1	0	0	0	0	0	0	0
PaD4	Anthschlech	1	0	0	0	0	0	0	0
PaO4	Anthschlech	1	0	0	0	0	0	0	0
PaS2	Anthschlech	1	0	0	0	0	0	0	0
EnO3	Aspl2500sp1	1	0	0	0	0	0	0	0
ZaD1	Asplauricul	1	0	0	0	0	0	0	0
CaD3	Asplcuspida	1	0	0	0	0	0	0	0
CaD5	Asplcuspida	1	0	0	0	0	0	0	0
CaO3	Asplharpeod	1	0	0	0	0	0	0	0
CaO5	Asplharpeod	1	0	0	0	0	0	0	0
CaD1	Asplharpeod	1	0	0	1	1	0	0	2
EnS5	Aspllineari	1	0	0	0	0	0	0	0
EnD2	Asplmonanth	1	0	0	0	0	0	0	0
ZaD2	Asplrutifol	1	0	0	0	0	0	0	0
CaO4	Blecfragile	1	0	0	0	0	0	0	0
CaS1	Blecfragile	1	0	0	0	0	0	0	0
PaO1	Brascuculla	1	0	0	0	0	0	0	0
MaD3	Brasnodosa	1	0	0	0	0	0	0	0
MaS1	Brasnodosa	1	0	0	0	0	0	0	0
MaO1	Brasnodosa	1	0	0	0	1	1	0	2
MaS2	Brasnodosa	1	0	0	0	1	1	0	2
ChD1	Brasverruco	1	0	0	0	0	0	0	0
ChD4	Brasverruco	1	0	0	0	0	0	0	0
ChD5	Brasverruco	1	0	0	0	0	0	0	0
ChO2	Brasverruco	1	0	0	0	0	0	0	0
PaD1	Brasverruco	1	0	0	0	0	0	0	0
PaD5	Brasverruco	1	0	0	0	0	0	0	0
ChD2	Brasverruco	1	0	0	1	0	0	0	1
ChO5	Brasverruco	1	0	1	0	0	0	0	1
PaD5	Camadensum	1	0	0	0	0	0	0	0
PaO5	Camadensum	1	0	0	0	0	0	0	0
ZaO2	Campamphost	1	0	0	0	0	0	0	0
CaD1	Campangusti	1	0	0	0	0	0	0	0
CaD5	Campangusti	1	0	0	0	0	0	0	0
ChD4	Campphyllit	1	0	0	0	0	0	0	0
ChO5	Campphyllit	1	0	0	0	0	0	0	0
PaD5	Campphyllit	1	0	0	0	0	0	0	0
PaD3	Cata500sp1	1	0	0	0	0	0	0	0
PaO1	Cata500sp1	1	0	0	0	0	0	0	0
PaO3	Cata500sp1	1	0	0	0	0	0	0	0
ChD1	Catainteger	1	0	0	0	0	0	0	0
ChD5	Catainteger	1	0	0	0	0	0	0	0
ChO2	Catainteger	1	0	0	0	0	0	0	0
CaS2	Catonitida	1	0	0	0	0	0	0	0
CaS3	Catonitida	1	0	0	0	0	1	0	1
EnS3	Catopanicul	1	0	0	0	0	0	0	0
EnD4	Catopanicul	1	0	0	1	1	0	0	2
CaD2	Catosessili	1	0	0	0	0	0	0	0
CaO3	Catosessili	1	0	0	0	0	0	0	0
CaO2	Catosessili	1	0	0	0	1	0	0	1
CaO1	Catosessili	1	0	0	0	1	1	0	2
PaO1	Catosessili	1	0	0	1	1	1	0	3
PaS1	Catt500sp1	1	0	0	0	0	0	0	0
ZaS5	Cochlineari	1	0	0	0	0	0	0	0
ZaO1	Cochlineari	1	1	0	0	0	0	0	1
ZaO2	Colu2000sp1	1	0	0	0	0	0	0	0
EnO4	Cystdiaphan	1	0	0	0	0	0	0	0
CaO2	Dich1500sp1	1	0	0	0	0	0	0	0
CaS1	Dich1500sp2	1	0	0	0	0	0	0	0
CaS2	Dich1500sp2	1	0	0	0	0	0	0	0
CaD5	Dichglauca	1	0	0	0	0	0	0	0
CaD2	Dichglauca	1	0	0	0	0	1	0	1
CaO3	Dichglauca	1	0	0	0	1	0	0	1
CaO4	Dichmuricat	1	0	0	0	0	0	0	0
CaS1	Dichmuricat	1	0	0	0	0	0	0	0
CaS4	Dichmuricat	1	0	0	0	0	0	0	0
CaD2	Didyreptans	1	0	0	0	0	0	0	0
CaD5	Didyreptans	1	0	0	0	0	0	0	0
CaO5	Didyreptans	1	0	0	0	0	0	0	0
CaS2	Didyreptans	1	0	0	0	0	0	0	0
CaS3	Didyreptans	1	0	0	0	0	0	0	0
CaO3	Didyreptans	1	1	0	0	0	0	0	1
ChD1	Dinepolybul	1	0	0	0	0	0	0	0
ChD5	Dinepolybul	1	0	0	0	0	0	0	0
EnS1	Diphthyoide	1	0	0	0	0	0	0	0
EnD1	Disoflagell	1	0	0	0	0	0	0	0
ZaD1	Disomartian	1	0	0	0	0	0	0	0
ZaO1	Disophyllan	1	0	0	0	1	0	0	1
CaO2	Elap1500sp1	1	0	0	0	0	0	0	0
CaO5	Elap1500sp1	1	0	0	0	0	0	0	0
PaO3	Elap500sp1	1	0	0	0	0	0	0	0
ZaO2	Elaperinace	1	0	0	0	0	0	0	0
ZaS4	Elaperinace	1	0	0	0	0	0	0	0
EnO3	Elapglaucum	1	0	0	0	0	0	0	0
ZaS4	Elapglaucum	1	0	0	0	0	0	0	0
ZaS3	Elapglaucum	1	0	0	1	0	0	0	1
EnO3	Elaplanceum	1	0	0	0	0	0	0	0
EnD1	Elaplanceum	1	0	0	1	0	0	0	1
ZaO5	Elapmuscosu	1	0	0	0	0	0	0	0
ZaO2	Elappaleace	1	0	0	0	0	0	0	0
ZaO4	Elappaleace	1	0	0	0	0	0	0	0
ZaD4	Elappaleace	1	0	0	1	0	0	0	1
CaO1	Elappetiola	1	0	0	0	0	0	0	0
CaD2	Elapsartori	1	0	0	0	0	0	0	0
CaS2	Elapsartori	1	0	0	0	0	0	0	0
EnD1	Elapsartori	1	0	0	1	0	0	0	1
EnS1	Elapsartori	1	1	0	0	0	0	0	1
ZaS3	Elapvestitu	1	0	0	0	0	0	0	0
ZaD4	Elapvestitu	1	0	0	1	0	0	0	1
PaO3	Elle500sp1	1	0	0	0	0	0	0	0
CaO2	Ellecynaroc	1	0	0	0	0	0	0	0
CaD3	Ency1500sp1	1	0	0	0	0	0	0	0
CaD4	Ency1500sp1	1	0	0	0	0	0	0	0
CaD2	Ency1500sp1	1	0	0	0	0	1	0	1
ZaD4	Epip2000sp1	1	0	0	0	0	0	0	0
ChD5	Epipphyllan	1	0	0	0	0	0	0	0
ChO4	Epipphyllan	1	0	0	0	0	0	0	0
ChS1	Epipphyllan	1	0	0	0	0	0	0	0
ChS2	Epipphyllan	1	0	0	0	0	0	0	0
PaD5	Epipphyllan	1	0	0	0	0	0	0	0
ChD2	Epipphyllan	1	0	0	0	1	0	0	1
ChD3	Epipphyllan	1	0	0	0	1	0	0	1
ChD4	Epipphyllan	1	0	0	1	1	0	0	2
ZaS3	Eric2500sp1	1	0	0	0	0	1	0	1
ZaO1	Eric2500sp1	1	0	0	0	1	0	0	1
ZaO2	Eric2500sp1	1	0	1	1	0	0	0	2
ZaD2	Gonifurfura	1	0	0	0	0	0	0	0
ZaD3	Gonifurfura	1	0	0	0	0	0	0	0
CaD4	Gonifurfura	1	0	0	0	0	0	0	0
CaO5	Gonifurfura	1	0	0	0	0	0	0	0
CaD2	Gonifurfura	1	0	0	1	0	0	0	1
CaO4	Gonifurfura	1	0	1	0	0	0	0	1
CaD5	Gonifurfura	1	0	0	0	1	1	0	2
CaD3	Gonifurfura	1	0	1	1	0	0	0	2
ZaS5	Hupepringle	1	0	0	0	0	0	0	0
ZaD1	Hylo2000sp1	1	0	0	0	0	0	0	0
EnD1	Hylo2500sp1	1	0	0	0	0	0	0	0
MaO2	Hyloundatus	1	0	0	0	0	0	0	0
MaO4	Hyloundatus	1	0	0	0	0	0	0	0
PaO4	Hyloundatus	1	0	0	0	0	0	0	0
ZaD4	Hymecrispum	1	0	0	0	0	0	0	0
EnO1	Hymetegular	1	0	0	0	0	0	0	0
ZaO1	Hymetegular	1	0	0	0	0	0	0	0
ZaO5	Hymetegular	1	0	0	0	0	0	0	0
ZaO3	Hymetegular	1	1	0	0	0	0	0	1
EnO1	Hymetrapezo	1	0	0	0	0	0	0	0
EnO3	Hymetrapezo	1	0	0	0	0	0	0	0
EnO5	Hymetrapezo	1	0	0	0	0	0	0	0
ChO1	Isoc1000sp1	1	0	0	0	0	0	0	0
CaD3	Isoc1500sp1	1	0	0	0	0	0	0	0
CaO4	Isoc1500sp1	1	0	0	0	0	0	0	0
ZaS3	Isocunilate	1	0	0	0	0	0	0	0
ZaS4	Isocunilate	1	0	0	0	0	0	0	0
CaD5	Jacqteretif	1	0	0	0	0	0	0	0
CaO1	Jacqteretif	1	0	0	0	0	0	0	0
CaO3	Jacqteretif	1	0	0	0	0	0	0	0
ChS1	Laelanceps	1	0	0	0	0	0	0	0
PaD1	Laelanceps	1	0	0	0	0	0	0	0
PaD2	Laelanceps	1	0	0	0	0	0	0	0
PaO4	Laelanceps	1	0	0	0	0	0	0	0
ZaO2	Leph2000sp1	1	0	0	0	0	0	0	0
ZaS4	Leph2000sp1	1	0	0	0	0	0	0	0
PaD3	Lyca500sp1	1	0	0	0	0	0	0	0
PaD5	Lyca500sp1	1	0	0	0	0	0	0	0
PaD2	Lyca500sp1	1	0	0	1	0	0	0	1
MaS1	Lygovenustu	1	0	0	0	0	0	0	0
EnD1	Maiapanicul	1	0	0	0	0	0	0	0
EnO4	Maiapanicul	1	0	0	0	0	0	0	0
EnO1	Maiapanicul	1	0	0	0	1	0	0	1
ZaO2	Maxi2000sp1	1	0	0	0	0	0	0	0
PaD1	Maxi500sp1	1	0	0	0	0	0	0	0
PaD2	Maxitenuifo	1	0	0	0	0	0	0	0
ZaD3	Melpleptost	1	0	0	0	0	0	0	0
ZaS5	Melpleptost	1	0	0	0	0	0	0	0
CaO5	Melpleptost	1	0	0	0	1	0	0	1
EnO1	Melppilosis	1	0	0	0	0	0	0	0
CaO3	Melppilosis	1	0	0	0	1	0	0	1
EnD5	Melpxiphopt	1	0	0	0	0	0	0	0
EnS1	Melpxiphopt	1	0	0	0	0	0	0	0
ZaO1	Melpxiphopt	1	0	0	0	0	0	0	0
ZaO2	Melpxiphopt	1	0	0	0	0	0	0	0
ChD4	Micrnitida	1	0	0	0	0	0	0	0
PaD2	Micrnitida	1	0	0	0	0	0	0	0
PaD5	Micrnitida	1	0	1	1	1	1	0	4
PaO1	Monsacumina	1	0	0	0	0	0	0	0
MaO4	Myrmtibicin	1	0	0	0	1	0	0	1
EnD2	Nelstapianu	1	0	0	0	0	0	0	0
EnD4	Nelstapianu	1	0	0	0	0	0	0	0
EnO3	Nelstapianu	1	0	0	0	0	0	0	0
EnO2	Nelstapianu	1	0	1	1	1	1	0	4
PaO1	Niph500sp1	1	0	0	0	0	0	0	0
PaO5	Niph500sp1	1	0	0	0	0	0	0	0
MaO3	Onci0sp1	1	0	0	0	0	0	0	0
CaS5	Onci1500sp1	1	0	0	0	0	0	0	0
PaD5	Onci500sp1	1	0	0	0	0	0	0	0
ZaO1	Onciincurvu	1	0	0	1	1	0	0	2
PaD1	Oncisphacel	1	0	0	0	0	0	0	0
PaD5	Oncisphacel	1	0	0	0	0	0	0	0
CaO1	Orch1500sp1	1	0	0	0	1	0	0	1
CaO3	Orch1500sp2	1	0	0	0	0	0	0	0
CaO4	Orch1500sp2	1	0	0	0	0	0	0	0
CaD3	Orch1500sp3	1	0	0	0	0	0	0	0
EnD1	Oreocapitat	1	0	0	0	0	0	0	0
ZaS4	Oreocapitat	1	0	0	0	1	0	0	1
PaO1	Orniinflexu	1	0	0	0	0	0	0	0
PaO5	Orniinflexu	1	0	0	0	0	0	0	0
ChS5	Orniinflexu	1	0	0	0	1	0	0	1
EnS1	Pecl2500sp1	1	0	0	0	0	0	0	0
ChD1	Peclatra	1	0	0	0	0	0	0	0
ChO5	Peclatra	1	0	0	0	0	0	0	0
ChD4	Peclatra	1	0	0	1	1	0	0	2
ChO4	Pecldispers	1	0	0	0	0	0	0	0
EnD2	Peclhartweg	1	0	0	0	0	0	0	0
EnD3	Peclhartweg	1	0	0	0	0	0	0	0
EnD4	Peclhartweg	1	0	0	1	0	0	0	1
EnO5	Peclhartweg	1	0	1	0	0	0	0	1
EnD5	Peclliebman	1	0	0	0	0	0	0	0
EnS4	Peclliebman	1	0	0	0	0	0	0	0
ZaS4	Pecllongepi	1	0	0	0	0	0	0	0
CaO3	Peclplumula	1	0	0	0	1	0	0	1
CaD1	Peclsursumc	1	0	0	0	0	0	0	0
CaO5	Peclsursumc	1	0	0	0	0	0	0	0
CaS4	Peclsursumc	1	0	0	0	0	0	0	0
CaO3	Peclsursumc	1	0	0	0	1	1	0	2
CaO1	Pepe1500sp1	1	0	0	0	0	0	0	0
CaS1	Pepe1500sp1	1	0	0	0	0	0	0	0
ZaD3	Pepe2000sp1	1	0	0	0	0	0	0	0
ZaD1	Pepe2000sp2	1	0	0	0	0	0	0	0
ZaO2	Pepe2000sp2	1	0	0	0	0	0	0	0
PaO1	Pepe500sp3	1	0	0	0	0	0	0	0
ZaD3	Pepearboric	1	0	0	0	0	0	0	0
CaD4	Pepearboric	1	0	0	0	0	0	0	0
PaO1	Pepeasarifo	1	0	0	0	0	0	0	0
PaD2	Pepeberland	1	0	0	0	0	0	0	0
PaD3	Pepeberland	1	0	0	0	0	0	0	0
PaO1	Pepeberland	1	0	0	0	0	0	0	0
PaS3	Pepeberland	1	0	0	0	0	0	0	0
CaD2	Pepeberland	1	0	0	0	0	0	0	0
CaD4	Pepeberland	1	0	0	0	0	0	0	0
CaD5	Pepeberland	1	0	0	0	0	0	0	0
CaO5	Pepeberland	1	0	0	0	0	0	0	0
CaS2	Pepeberland	1	0	0	0	0	0	0	0
CaS5	Pepeberland	1	0	0	0	0	0	0	0
CaO1	Pepeberland	1	0	1	0	0	0	0	1
PaO4	Pepeberland	1	1	0	0	0	0	0	1
CaD1	Pepeberland	1	0	1	0	1	0	0	2
ZaO1	Pepecobana	1	0	0	0	0	0	0	0
ZaD5	Pepecobana	1	0	0	1	1	0	0	2
CaD4	Pepeglabell	1	0	0	0	0	0	0	0
ZaS3	Pepeleptoph	1	0	0	0	0	0	0	0
CaD3	Pepeleptoph	1	0	0	0	0	0	0	0
ZaO1	Pepeleptoph	1	1	0	0	0	0	0	1
EnS2	Pepeleptoph	1	1	0	1	1	0	0	3
CaD4	Pepeobtusif	1	0	0	0	0	0	0	0
PaD2	Pepeobtusif	1	0	0	0	1	0	0	1
ZaD1	Pepequadrif	1	0	0	0	0	0	0	0
ZaO4	Pepequadrif	1	0	0	0	0	0	0	0
ZaS3	Pepequadrif	1	0	0	0	0	0	0	0
CaD4	Pepequadrif	1	0	0	0	0	0	0	0
CaO3	Pepequadrif	1	0	0	0	0	1	0	1
ZaO2	Pepequadrif	1	1	0	1	1	0	0	3
EnS2	Pepetenerri	1	0	0	0	0	0	0	0
ZaD1	Pepetenerri	1	0	0	0	0	0	0	0
ZaD5	Pepetenerri	1	0	0	0	0	0	0	0
CaS2	Pepetenerri	1	0	0	0	0	0	0	0
ZaD2	Pepetenerri	1	0	1	0	0	0	0	1
EnO4	Pepetenerri	1	0	0	1	1	0	0	2
ChO3	Pepetetraph	1	0	0	1	0	0	0	1
CaO2	Philadvena	1	0	0	0	0	0	0	0
PaD2	Philjacquin	1	0	0	0	0	0	0	0
PaD3	Philradiatu	1	0	0	0	0	0	0	0
PaO1	Philradiatu	1	0	0	0	0	0	0	0
PaO4	Philradiatu	1	0	0	0	1	0	0	1
ChD1	Philsagitti	1	0	0	0	0	0	0	0
ChO2	Phleareolat	1	0	0	0	0	0	0	0
CaD1	Phleareolat	1	0	0	0	0	0	0	0
CaS2	Phleareolat	1	0	0	0	0	0	0	0
ZaD2	Phleareolat	1	0	0	0	1	0	0	1
CaO5	Phleareolat	1	0	1	0	0	0	0	1
EnS1	Phlecuernav	1	0	0	0	0	0	0	0
EnO1	Phlepringle	1	0	0	0	1	0	0	1
EnO5	Phlepringle	1	0	1	0	0	0	0	1
ChO3	Phlepseudoa	1	0	0	0	0	0	0	0
ChS3	Phlepseudoa	1	0	0	0	0	0	0	0
ChS5	Phlepseudoa	1	0	0	0	0	0	0	0
ZaD1	Phlepseudoa	1	0	0	0	0	0	0	0
CaD2	Phlepseudoa	1	0	0	0	0	0	0	0
CaO2	Phlepseudoa	1	0	0	0	0	0	0	0
CaS1	Phlepseudoa	1	0	0	0	0	0	0	0
CaS4	Phlepseudoa	1	0	0	0	0	0	0	0
CaD5	Phlepseudoa	1	0	0	0	1	0	0	1
PaO2	Phlopeperom	1	0	0	0	0	0	0	0
PaO4	Phlopeperom	1	0	0	0	0	0	0	0
ZaS4	Pingmoranen	1	1	0	0	0	0	0	1
CaD1	Pleoangusta	1	0	0	0	0	0	0	0
CaO5	Pleoangusta	1	0	0	0	0	0	0	0
CaS1	Pleoangusta	1	0	0	0	0	0	0	0
CaO1	Pleocomplan	1	0	0	0	0	0	0	0
CaD2	Pleocrassin	1	0	0	0	0	0	0	0
CaD4	Pleocrassin	1	0	0	0	0	0	0	0
CaO5	Pleocrassin	1	0	0	0	0	0	0	0
CaO4	Pleocrassin	1	0	0	0	1	0	0	1
ZaD5	Pleomexican	1	0	0	0	0	0	0	0
ZaO1	Pleomexican	1	0	0	0	0	0	0	0
CaO3	Pleomexican	1	0	0	0	1	0	0	1
CaS3	Pleomexican	1	0	0	1	0	1	0	2
EnD1	Pleop.inter	1	0	0	1	1	0	0	2
EnS5	Pleop.inter	1	1	1	0	0	0	0	2
CaO1	Pleop.polyl	1	0	0	0	0	0	0	0
CaO3	Pleop.polyl	1	0	0	0	0	0	0	0
CaO4	Pleop.polyl	1	0	0	0	0	0	0	0
CoO4	Pleoplebeia	1	0	0	0	0	0	0	0
CaD1	Pleoplebeia	1	0	0	0	0	0	0	0
CaD5	Pleoplebeia	1	0	0	0	0	0	0	0
CaS4	Pleoplebeia	1	0	0	0	0	0	0	0
PeD2	Pleoplebeia	1	1	0	0	0	0	0	1
CaD3	Pleoplebeia	1	0	0	0	1	1	0	2
CaD4	Pleoplebeia	1	0	0	1	1	0	0	2
CoD3	Pleoplebeia	1	0	1	1	0	0	0	2
CoD5	Pleoplebeia	1	0	1	1	0	0	0	2
CoS5	Pleoplebeia	1	0	1	1	0	0	0	2
PeD4	Pleopolylep	1	0	1	0	0	0	0	1
PeO3	Pleopolylep	1	0	1	0	0	0	0	1
PeD3	Pleopolylep	1	1	0	0	0	0	0	1
PeO1	Pleopolylep	1	1	0	0	0	0	0	1
ZaO5	Pleu2000sp1	1	0	0	0	1	1	0	2
ZaO2	Pleu2000sp2	1	0	0	1	0	0	0	1
CaO5	Pleupachygl	1	0	0	0	0	0	0	0
CaO1	Poly1500sp1	1	0	0	0	0	0	0	0
EnS3	Polycf.frat	1	0	0	1	0	0	0	1
CaO3	Polycollins	1	0	0	0	0	0	0	0
CaO5	Polycollins	1	0	0	1	0	0	0	1
ZaD1	Polyfratern	1	0	0	0	0	0	0	0
ZaO1	Polyfratern	1	0	0	0	0	0	0	0
PaO1	Polyfurfura	1	0	0	0	0	0	0	0
PaD2	Polyfurfura	1	0	0	0	0	1	0	1
PaD1	Polyfurfura	1	0	0	0	1	0	0	1
PeS2	Polyhartweg	1	1	0	0	0	0	0	1
PeS4	Polyhartweg	1	0	1	1	0	0	0	2
CaD3	Polylepidot	1	0	0	0	0	0	0	0
ChD2	Polyplebeiu	1	0	0	0	0	0	0	0
ChD3	Polyplebeiu	1	0	0	0	0	0	0	0
ChS4	Polyplebeiu	1	0	0	0	0	0	0	0
EnD2	Polyplebeiu	1	0	0	0	0	0	0	0
EnD3	Polyplebeiu	1	0	0	0	0	0	0	0
CaS5	Polyplebeiu	1	0	0	0	0	0	0	0
ZaS4	Polyplebeiu	1	0	0	0	1	0	0	1
CaO2	Polypolypod	1	0	0	0	1	0	0	1
EnD4	Polypolypod	1	0	0	1	1	0	0	2
EnD2	Polypuberul	1	0	0	0	0	0	0	0
EnO1	Polypuberul	1	0	0	0	0	0	0	0
EnO2	Polypuberul	1	0	0	0	0	0	0	0
EnO4	Polypuberul	1	0	0	0	0	0	0	0
EnS1	Polypuberul	1	0	0	0	0	0	0	0
EnS2	Polypuberul	1	0	0	0	0	0	0	0
CaS2	Polypuberul	1	0	0	0	0	0	0	0
CaS4	Polypuberul	1	0	0	0	0	0	0	0
ZaD2	Polypuberul	1	0	0	0	1	0	0	1
ZaD4	Polypuberul	1	0	0	0	1	0	0	1
ZaD3	Polypuberul	1	0	0	1	1	0	0	2
CaS1	Pros1500sp1	1	0	0	0	0	0	0	0
CaS3	Pros1500sp1	1	0	0	0	0	0	0	0
CaS4	Pros1500sp1	1	0	0	0	0	0	0	0
CaS5	Pros1500sp1	1	0	0	0	0	0	0	0
ChO3	Proscochlea	1	0	0	0	0	0	0	0
EnD1	Proscochlea	1	0	0	0	0	0	0	0
PaS3	Proscochlea	1	0	0	0	1	0	0	1
PaO5	Proslivida	1	0	0	0	0	0	0	0
PaD1	Prosradiata	1	0	0	0	0	0	0	0
PaD2	Prosradiata	1	0	0	0	0	0	0	0
PaO1	Prosradiata	1	0	0	0	0	0	0	0
ZaS3	Prosvaricos	1	0	0	0	0	0	0	0
ZaO1	Prosvaricos	1	0	0	0	1	1	0	2
ZaD3	Prosvitelli	1	0	0	0	0	0	0	0
ZaD5	Prosvitelli	1	0	0	0	0	0	0	0
ZaS5	Prosvitelli	1	0	0	0	0	0	0	0
ZaO1	Prosvitelli	1	0	0	0	1	0	0	1
CaO3	Prosvitelli	1	0	0	0	1	0	0	1
PaD1	Rhipbaccife	1	0	0	0	0	0	0	0
PaD5	Rhipbaccife	1	0	0	0	0	0	0	0
PaO4	Rhipbaccife	1	0	0	0	0	0	0	0
CaD4	Rhipbaccife	1	0	0	0	0	0	0	0
PaO1	Rhipbaccife	1	0	0	0	1	0	0	1
ChO3	Rhipbaccife	1	0	0	1	0	0	0	1
PaD3	Rhipbaccife	1	0	0	0	1	1	0	2
EnD1	Rhyn2500sp1	1	0	0	0	0	0	0	0
EnO2	Rhyn2500sp1	1	0	0	0	1	0	0	1
EnD5	Rhynehrenbe	1	0	0	0	0	0	0	0
EnS3	Rhynehrenbe	1	0	0	0	0	0	0	0
PaD1	Rhynehrenbe	1	0	0	0	0	0	0	0
PaD2	Rhynglauca	1	0	0	0	0	1	0	1
ZaD4	Rhynrossii	1	0	0	0	0	0	0	0
ChO3	Scap1000sp1	1	0	0	0	0	0	0	0
ChO4	Scap1000sp1	1	0	0	1	0	0	0	1
ChD1	Scap1000sp1	1	0	0	0	1	1	0	2
PaO3	Scaplivida	1	0	0	0	0	0	0	0
PaO4	Schanigripe	1	0	0	0	0	0	0	0
EnO2	Scolensifor	1	0	0	0	0	0	0	0
ZaD1	Scolensifor	1	0	0	0	0	0	0	0
ZaD3	Sedubotteri	1	0	0	0	0	0	0	0
ZaO2	Sedubotteri	1	0	0	0	0	0	0	0
EnD3	Sedubotteri	1	0	0	0	1	0	0	1
ZaS4	Sedubotteri	1	0	0	0	1	0	0	1
EnS5	Sedubotteri	1	1	0	0	0	0	0	1
EnO2	Sedubotteri	1	0	0	1	1	0	0	2
EnD1	Sedubotteri	1	1	0	0	1	1	0	3
EnO1	Seduguatema	1	0	0	0	1	0	0	1
PaD1	Sele500sp2	1	0	0	0	0	0	0	0
MaO3	Selegrandif	1	0	0	0	0	0	0	0
PaD5	Selegrandif	1	0	0	0	0	0	0	0
PaO1	Selegrandif	1	0	0	1	0	0	0	1
MaD5	Selegrandif	1	0	0	0	1	1	0	2
MaS3	Seletestudo	1	0	0	0	0	0	0	0
PaD3	Seletestudo	1	0	0	0	0	0	0	0
PaO4	Seletestudo	1	0	0	0	0	0	0	0
ZaD2	Serpfalcari	1	0	0	0	0	0	0	0
ZaD4	Serpfalcari	1	0	0	0	0	0	0	0
ZaS4	Serpfalcari	1	0	0	0	0	0	0	0
CaD3	Serpfalcari	1	0	0	0	0	0	0	0
CaS2	Serpfalcari	1	0	0	0	0	0	0	0
CaS3	Serpfalcari	1	0	0	0	0	0	0	0
EnO5	Serpfalcari	1	0	0	0	1	0	0	1
ZaD3	Serpfalcari	1	0	1	0	0	0	0	1
ZaO1	Spec2000sp1	1	0	0	0	0	0	0	0
PaO4	Spec500sp1	1	0	0	0	0	0	0	0
PaO5	Specdigital	1	0	0	0	0	0	0	0
PaS3	Specgrobyi	1	0	0	1	0	0	0	1
ChD2	Stel1000sp1	1	0	0	0	0	0	0	0
CaS2	Stel1500sp1	1	0	0	0	0	0	0	0
PaD2	Stel500sp1	1	0	0	0	0	0	0	0
PaO2	Stel500sp1	1	0	0	0	0	0	0	0
PaO3	Stel500sp1	1	0	0	0	0	0	0	0
PaD3	Stelemargin	1	0	0	0	0	0	0	0
ZaS4	Steloaxacan	1	0	0	0	0	1	0	1
ZaO2	Stenprionod	1	0	0	0	0	0	0	0
ZaS4	Stenprionod	1	0	0	0	0	0	0	0
CaD3	Syng1500sp1	1	0	0	0	0	0	0	0
CaS3	Syng1500sp1	1	0	0	0	0	0	0	0
ChD2	Syngneglect	1	0	0	0	0	0	0	0
ChO2	Syngneglect	1	0	0	0	0	0	0	0
PaD4	Syngneglect	1	0	0	0	0	0	0	0
PaS1	Syngneglect	1	0	0	0	0	0	0	0
CaD3	Terpaspleni	1	0	0	0	0	0	0	0
MaS1	Till0sp1	1	0	0	0	0	0	0	0
MaD1	Till0sp1	1	0	0	1	0	0	0	1
ZaD3	Till2000sp1	1	0	0	0	0	0	0	0
ZaD4	Till2000sp1	1	0	0	0	0	0	0	0
ZaS2	Till2000sp1	1	0	0	0	0	0	0	0
ZaS4	Till2000sp1	1	0	0	0	0	0	0	0
ChS1	Tillbotteri	1	0	0	0	0	0	0	0
ChS2	Tillbotteri	1	0	0	0	0	0	0	0
ChS4	Tillbotteri	1	0	0	0	0	0	0	0
PaD3	Tillbotteri	1	0	0	1	0	0	0	1
PaO2	Tillbrachyc	1	0	0	0	0	0	0	0
PaD1	Tillbrachyc	1	0	0	0	0	0	1	1
PaO3	Tillbrachyc	1	0	0	0	1	0	0	1
PaO4	Tillbrachyc	1	0	0	0	1	0	0	1
PaO5	Tillbrachyc	1	0	0	0	1	0	0	1
CaO2	Tillbutzii	1	0	0	0	0	0	0	0
CaD4	Tillbutzii	1	0	0	0	1	0	0	1
CaS4	Tillbutzii	1	0	0	0	1	0	0	1
CaD3	Tillbutzii	1	0	1	1	1	0	0	3
MaO1	Tillcircinn	1	0	0	0	1	0	0	1
MaO1	Tillconcolo	1	0	0	0	0	0	0	0
PaD5	Tillfoliosa	1	0	0	0	0	0	0	0
CaD4	Tillghiesbr	1	0	0	0	0	0	0	0
CaO5	Tillghiesbr	1	0	0	1	0	1	0	2
ZaD1	Tillgymnobo	1	0	0	0	0	0	0	0
ZaD4	Tillgymnobo	1	0	0	0	0	0	0	0
ZaO1	Tillgymnobo	1	0	0	0	1	0	0	1
ZaO2	Tillgymnobo	1	0	1	0	0	0	0	1
ZaD5	Tillgymnobo	1	0	0	0	1	1	0	2
EnD4	Tillgymnobo	1	0	1	1	1	1	0	4
ZaD2	Tillimperia	1	0	0	0	0	0	0	0
ZaO1	Tillimperia	1	0	0	0	0	0	0	0
EnS5	Tillimperia	1	0	0	1	1	0	0	2
ChD3	Tillionanth	1	0	0	0	0	0	0	0
ChS4	Tillionanth	1	0	0	0	0	0	0	0
MaS4	Tillionanth	1	0	0	1	0	0	0	1
PaS3	Tillionanth	1	0	0	1	1	1	0	3
PaS5	Tillionanth	1	0	1	1	1	0	0	3
CaO2	Tilljuncea	1	0	0	0	0	0	0	0
CaS2	Tilljuncea	1	0	0	0	0	0	0	0
CaS5	Tilljuncea	1	0	0	0	0	0	0	0
CaO3	Tillkirchho	1	0	0	0	0	1	0	1
CaS4	Tillkirchho	1	0	0	0	1	0	0	1
CaD3	Tillkirchho	1	0	0	1	1	1	0	3
ChD2	Tilllimbata	1	0	0	0	0	0	0	0
ChS4	Tilllimbata	1	0	0	0	0	0	0	0
ChS5	Tilllimbata	1	0	0	0	0	0	0	0
PaD3	Tilllimbata	1	0	0	0	0	0	0	0
PaO2	Tilllimbata	1	0	0	0	0	0	0	0
PaO4	Tilllimbata	1	0	0	0	0	0	0	0
ChD5	Tilllimbata	1	0	0	0	1	0	0	1
ZaO1	Tilllucida	1	0	0	0	1	0	0	1
ZaD5	Tillmacrope	1	0	0	0	0	0	0	0
CaD3	Tillmacrope	1	0	1	1	0	0	0	2
CaO2	Tillmultica	1	0	0	0	0	0	0	0
ZaO1	Tillmultica	1	0	0	0	1	0	0	1
CaO1	Tillmultica	1	0	0	0	1	0	0	1
ZaD2	Tillmultica	1	0	0	1	0	0	0	1
CaO3	Tillmultica	1	0	0	0	1	1	0	2
CaO5	Tillmultica	1	0	0	1	1	0	0	2
ChO3	Tillpolysta	1	0	0	0	0	0	0	0
ChS1	Tillpolysta	1	0	0	0	0	0	0	0
PaS3	Tillpolysta	1	0	0	0	0	1	0	1
ChO2	Tillpolysta	1	0	0	1	0	0	0	1
PaD3	Tillpolysta	1	0	0	1	1	0	0	2
PaO4	Tillpunctul	1	0	0	0	0	0	0	0
CaD4	Tillpunctul	1	0	0	0	0	0	0	0
CaS4	Tillpunctul	1	0	0	0	0	0	0	0
CaO2	Tillpunctul	1	0	0	0	1	0	0	1
CaS1	Tillpunctul	1	0	0	0	1	0	0	1
ZaD2	Tillpunctul	1	0	0	1	0	1	0	2
CaD4	Tillrecurva	1	0	0	0	0	0	0	0
CaD5	Tillrecurva	1	0	0	0	0	0	0	0
CaD2	Tillrecurva	1	0	0	0	0	0	1	1
ChO3	Tillschiede	1	0	0	0	0	0	0	0
ChS1	Tillschiede	1	0	0	0	0	0	0	0
PaO5	Tillschiede	1	0	0	0	0	0	0	0
PaS3	Tillschiede	1	0	0	1	1	1	0	3
PaO1	Tillstrepto	1	0	0	0	0	1	0	1
PaS5	Tilltricolo	1	0	1	0	0	0	0	1
PaD2	Tillusneoid	1	0	0	0	0	0	0	0
PaD5	Tillusneoid	1	0	0	0	0	0	0	0
ChD1	Tillutricul	1	0	0	0	0	0	0	0
MaD4	Tillutricul	1	0	0	0	0	0	0	0
MaD5	Tillutricul	1	0	0	0	0	0	0	0
EnO3	Tillviolace	1	0	0	0	0	0	0	0
ZaO1	Tillviolace	1	0	0	0	0	0	0	0
ZaO2	Tillviolace	1	0	0	0	0	0	0	0
EnD3	Tillviolace	1	0	0	0	0	1	0	1
EnO2	Tillviolace	1	0	0	0	1	0	0	1
EnD4	Tillviolace	1	1	0	0	0	0	0	1
EnS5	Tillviolace	1	1	0	0	0	0	0	1
CaO2	Tillviridif	1	0	0	0	0	0	0	0
ZaD1	Tillviridif	1	0	0	0	0	0	0	0
ChS2	Tric1000sp1	1	0	0	0	0	0	0	0
PaO4	Tric500sp1	1	0	0	0	0	0	0	0
CaD5	Triccapilla	1	0	0	0	0	0	0	0
CaO1	Triccapilla	1	0	0	0	0	0	0	0
CaS2	Triccapilla	1	0	0	0	0	0	0	0
CaS5	Triccapilla	1	0	0	0	0	0	0	0
ChD2	Tricstramin	1	0	0	0	0	0	0	0
ChO3	Tricstramin	1	0	0	0	0	0	0	0
PaO1	Tricstramin	1	0	0	0	0	0	0	0
ZaD5	Vandradican	1	0	0	0	0	0	0	0
PaD2	Vani500sp1	1	0	0	0	0	0	0	0
CaO2	Vittgramini	1	0	0	0	0	0	0	0
CaO3	Vittgramini	1	0	0	0	0	0	0	0
ZaS4	Vittgramini	1	0	0	0	0	0	0	0
CaO4	Vittgramini	1	0	0	0	0	0	0	0
CaO5	Vittgramini	1	0	1	0	0	0	0	1
ZaO2	Vittgramini	1	1	0	0	0	0	0	1
EnO5	Vittgramini	1	0	1	1	0	0	0	2
EnD4	Vittgramini	1	1	1	0	0	0	0	2
ZaS1	Weravanhyni	1	0	0	0	0	0	0	0
ZaO2	Weravanhyni	1	0	0	1	0	0	0	1
MaO5	Aechbractea	2	0	0	0	0	0	0	0
MaS2	Aechbractea	2	0	0	0	0	0	0	0
PaD2	Aechbractea	2	0	0	0	0	0	0	0
MaS1	Aechbractea	2	0	0	0	1	0	0	1
ZaD4	Anthandicol	2	0	0	0	1	0	0	1
PaD1	Anthpodophy	2	0	0	0	0	0	0	0
PaO5	Anthpodophy	2	0	0	0	0	0	0	0
CaD4	Anthscanden	2	0	0	0	0	0	0	0
PaD1	Anthschlech	2	0	0	0	0	0	0	0
PaO5	Anthschlech	2	0	0	0	0	0	0	0
CaD1	Asplcuspida	2	0	0	0	0	0	0	0
CaD2	Asplcuspida	2	0	0	0	0	0	0	0
EnO1	Asplcuspida	2	0	0	0	0	0	0	0
EnD1	Asplharpeod	2	0	0	0	0	0	0	0
EnO4	Aspllineari	2	0	1	0	0	0	0	1
EnO5	Asplmonanth	2	0	0	0	0	0	0	0
CaD1	Blecfragile	2	0	0	0	0	0	0	0
CaO2	Blecfragile	2	0	0	0	0	0	0	0
ChO4	Brasverruco	2	0	0	0	1	0	0	1
ChO3	Brasverruco	2	0	0	1	0	0	0	1
EnD1	Campamphost	2	0	0	0	0	0	0	0
ZaD3	Campamphost	2	0	0	0	0	0	0	0
ZaD4	Campamphost	2	0	0	0	0	0	0	0
EnO2	Campangusti	2	0	0	0	0	0	0	0
EnO5	Campangusti	2	0	0	0	0	0	0	0
PaD1	Campphyllit	2	0	0	0	0	0	0	0
PaO3	Campphyllit	2	0	0	1	0	0	0	1
PaD2	Cata500sp1	2	0	0	0	0	0	0	0
CaS1	Catonitida	2	0	0	0	0	0	0	0
CaS5	Catonitida	2	0	0	0	0	0	0	0
CaS2	Catosessili	2	0	0	0	0	0	0	0
ZaD1	Catosessili	2	0	0	0	0	0	0	0
ZaD2	Catosessili	2	0	0	0	0	0	0	0
CaD3	Catosessili	2	0	0	0	0	1	0	1
CaS4	Catosessili	2	0	0	0	1	0	0	1
PaO2	Catosessili	2	0	0	0	1	0	0	1
PaS3	Catosessili	2	0	0	0	1	0	0	1
CaO4	Catosessili	2	0	0	1	0	0	0	1
CaD1	Catosessili	2	0	0	0	1	0	1	2
ZaO2	Cochlineari	2	1	0	0	0	0	0	1
EnD4	Dendarboreu	2	0	0	0	1	0	0	1
EnO3	Dendarboreu	2	0	0	1	0	1	0	2
CaO5	Dich1500sp1	2	0	0	0	0	0	0	0
CaD3	Didyreptans	2	0	0	0	0	0	0	0
CaD4	Didyreptans	2	0	0	0	0	0	0	0
ChO1	Dinepolybul	2	0	0	0	0	0	0	0
ChD2	Dinepolybul	2	0	0	1	0	0	0	1
ZaO1	Disoflagell	2	0	0	0	0	0	0	0
ZaD4	Disoflagell	2	0	0	0	1	0	0	1
EnO1	Echerosea	2	0	0	0	0	0	0	0
ZaD1	Elaperinace	2	0	0	0	0	0	0	0
ZaS5	Elapglaucum	2	0	0	1	0	0	0	1
EnS1	Elaplanceum	2	0	0	1	0	0	0	1
CaO3	Elaplonchop	2	0	0	0	0	0	0	0
EnS1	Elappeltatu	2	0	0	0	0	0	0	0
ZaS1	Elappeltatu	2	0	0	0	0	0	0	0
CaD5	Elappringle	2	0	0	0	0	0	0	0
ZaO1	Elapsartori	2	0	0	0	0	0	0	0
CaD1	Elapsartori	2	0	0	0	0	0	0	0
EnD5	Elapsartori	2	0	0	1	0	0	0	1
ZaS4	Elapvestitu	2	0	0	0	0	0	0	0
CaO3	Ellecynaroc	2	0	0	0	0	0	0	0
CaO2	Epid1500sp1	2	0	0	0	0	0	0	0
CaD5	Epid1500sp2	2	0	0	0	0	0	0	0
PaS2	Epid500sp1	2	0	0	0	0	0	0	0
PaD1	Epipphyllan	2	0	0	0	0	0	0	0
EnO2	Eric2500sp1	2	0	0	0	0	0	0	0
EnO1	Eric2500sp1	2	0	0	1	1	0	0	2
ChO2	Gonifurfura	2	0	0	0	0	0	0	0
ChO4	Gonifurfura	2	0	0	0	0	0	0	0
CaO1	Gonifurfura	2	0	0	0	0	0	0	0
CaS3	Gonifurfura	2	0	0	1	0	0	0	1
ZaD1	Hupecuernav	2	0	0	0	0	0	0	0
ZaO1	Hupepringle	2	0	0	0	0	0	0	0
PaD1	Hyloundatus	2	0	0	0	1	0	0	1
PaS5	Hyloundatus	2	0	0	0	1	0	0	1
PaS4	Hyloundatus	2	0	0	1	1	0	0	2
ZaS5	Hymefucoide	2	0	0	0	0	0	0	0
EnO4	Hymetegular	2	1	0	0	0	0	0	1
CaS1	Isoc1500sp1	2	0	0	0	0	0	0	0
PaD1	Isoc500sp1	2	0	0	0	0	0	0	0
EnO5	Isocunilate	2	0	0	0	0	0	0	0
ZaO1	Maiapanicul	2	0	0	0	0	0	0	0
PaD2	Maxi500sp1	2	0	0	0	0	1	0	1
EnO1	Melpxiphopt	2	0	0	0	0	0	0	0
CaO4	Melpxiphopt	2	0	0	0	0	0	0	0
MaO4	Micrnitida	2	0	0	0	0	0	0	0
PaO3	Monsacumina	2	0	0	1	0	0	0	1
PaO2	Niph500sp1	2	0	0	0	0	0	0	0
ZaS4	Onciincurvu	2	0	0	0	0	0	0	0
PaD2	Oncisphacel	2	0	0	0	0	0	0	0
PaS2	Oncisphacel	2	0	0	0	0	0	0	0
PaS3	Oncisphacel	2	1	0	0	0	0	0	1
CaO5	Orch1500sp1	2	0	0	0	0	0	0	0
CaO2	Orch1500sp1	2	0	0	0	0	1	0	1
CaO1	Orch1500sp2	2	0	0	0	0	0	0	0
ChS3	Orniinflexu	2	0	0	0	0	0	0	0
ChS3	Peclatra	2	0	0	0	0	0	0	0
PaO1	Pecldivaric	2	0	0	0	0	0	0	0
EnO2	Peclhartweg	2	0	0	1	1	0	0	2
ZaD5	Peclhartweg	2	0	0	1	1	0	0	2
ZaS1	Pecllongepi	2	0	1	1	0	0	0	2
CaO1	Peclsursumc	2	0	0	0	0	0	0	0
CaS3	Peclsursumc	2	0	0	0	0	0	0	0
CaO2	Peclsursumc	2	0	0	1	0	0	0	1
CaO5	Pepe1500sp1	2	0	0	0	0	0	0	0
CaO1	Pepe1500sp2	2	0	0	0	0	0	0	0
CaO5	Pepe1500sp2	2	0	0	0	0	0	0	0
EnD3	Pepe2500sp1	2	1	0	0	1	0	0	2
EnO5	Pepe2500sp2	2	0	0	0	0	0	0	0
ZaD5	Pepearboric	2	0	0	0	0	0	0	0
ZaO2	Pepearboric	2	0	0	0	0	0	0	0
ZaS2	Pepearboric	2	1	0	0	0	0	0	1
CaO2	Pepeberland	2	0	0	0	0	0	0	0
CaO3	Pepeberland	2	0	0	1	1	0	0	2
ZaO2	Pepecobana	2	0	0	0	0	0	0	0
ZaD4	Pepeleptoph	2	0	0	0	0	0	0	0
PaO4	Pepeobtusif	2	0	0	0	0	0	0	0
ZaD2	Pepequadrif	2	0	0	0	0	0	0	0
ZaS4	Pepequadrif	2	0	0	0	0	0	0	0
CaO4	Pepequadrif	2	0	0	0	0	1	0	1
ZaD4	Pepequadrif	2	0	0	0	1	1	0	2
ZaD3	Pepequadrif	2	0	0	1	1	0	0	2
CaS4	Pepesanjose	2	0	0	0	0	0	0	0
EnO1	Pepesp.nov	2	0	0	0	0	0	0	0
EnS1	Pepetenerri	2	0	0	0	0	0	0	0
EnS5	Pepetenerri	2	0	0	0	0	0	0	0
ZaD4	Pepetenerri	2	0	0	0	0	0	0	0
ZaS4	Pepetenerri	2	0	0	0	0	0	0	0
ZaS5	Pepetenerri	2	0	0	0	0	0	0	0
CaO2	Pepetenerri	2	0	0	0	0	0	0	0
ZaO2	Pepetenerri	2	1	0	0	0	0	0	1
EnD1	Pepetenerri	2	0	0	1	1	0	0	2
EnO3	Pepetenerri	2	1	0	1	0	0	0	2
ChO5	Pepetetraph	2	0	0	0	0	1	0	1
PaD3	Philhederac	2	0	0	0	0	1	0	1
PaD1	Philradiatu	2	0	0	0	0	0	0	0
PaO2	Philradiatu	2	0	0	0	0	0	0	0
PaO5	Philradiatu	2	0	0	0	0	0	0	0
ChD3	Philsagitti	2	0	0	0	0	0	0	0
ZaD5	Phleareolat	2	0	0	0	0	0	0	0
CaD4	Phleareolat	2	0	0	0	0	0	0	0
ZaS4	Phleareolat	2	0	0	0	0	1	0	1
CaS1	Phleareolat	2	0	0	0	1	0	0	1
ChO5	Phlepseudoa	2	0	0	0	0	0	0	0
ZaD3	Phlepseudoa	2	0	0	0	0	0	0	0
ZaD4	Phlepseudoa	2	0	0	0	0	0	0	0
CaS5	Phlepseudoa	2	0	0	0	0	0	0	0
ZaO2	Phlepseudoa	2	0	0	0	0	1	0	1
ZaO1	Phlepseudoa	2	0	1	0	1	1	0	3
ChS2	Pleoacicula	2	0	0	1	1	0	0	2
CaD2	Pleoangusta	2	0	0	0	0	0	0	0
CaS5	Pleoangusta	2	0	0	0	0	0	0	0
CaO1	Pleoangusta	2	0	0	0	1	0	0	1
ChS1	Pleocrassin	2	0	0	0	0	0	0	0
ZaS3	Pleocrassin	2	0	0	0	0	0	0	0
CaO3	Pleocrassin	2	0	0	0	0	0	0	0
ZaD5	Pleocrassin	2	0	0	0	1	0	0	1
CaO1	Pleocrassin	2	0	0	0	1	0	0	1
CaS4	Pleomexican	2	0	0	0	0	0	0	0
CaS2	Pleomexican	2	0	0	0	1	0	0	1
EnD4	Pleop.inter	2	0	0	1	0	0	0	1
EnD2	Pleop.inter	2	0	0	0	1	1	0	2
EnS2	Pleop.inter	2	0	0	1	1	0	0	2
EnS3	Pleop.inter	2	0	0	1	1	0	0	2
CaO5	Pleop.polyl	2	0	0	0	0	0	0	0
CaS1	Pleoplebeia	2	0	0	0	0	0	0	0
CoO2	Pleoplebeia	2	1	0	0	0	0	0	1
PeD5	Pleoplebeia	2	1	0	0	0	0	0	1
PeO2	Pleopolylep	2	1	0	0	0	0	0	1
PeS2	Pleopolylep	2	1	0	0	0	0	0	1
PeS3	Pleopolylep	2	1	0	0	0	0	0	1
ZaO1	Pleopolypod	2	0	0	0	0	0	0	0
CaS1	Pleu1500sp1	2	0	0	0	0	0	0	0
ZaD4	Pleu2000sp1	2	0	0	0	0	1	0	1
CaS5	Poly1500sp2	2	0	0	0	0	0	0	0
ZaD3	Polyfratern	2	0	0	0	0	0	0	0
ZaD5	Polyfratern	2	0	0	0	0	0	0	0
PaD5	Polyfurfura	2	0	0	0	0	0	0	0
ChO1	Polyfurfura	2	0	0	0	1	0	0	1
PaS1	Polyfurfura	2	0	0	1	1	0	0	2
PaS4	Polyfurfura	2	0	0	1	1	0	0	2
PeO1	Polyhartweg	2	0	1	0	0	0	0	1
PeO4	Polyhartweg	2	0	1	0	0	0	0	1
PeS1	Polyhartweg	2	0	1	0	0	0	0	1
PeD3	Polyhartweg	2	1	0	0	0	0	0	1
PeS3	Polyhartweg	2	1	0	0	0	0	0	1
CaD1	Polylineatu	2	0	0	0	0	0	0	0
EnO2	Polyplebeiu	2	0	0	0	0	0	0	0
CaS2	Polyplebeiu	2	0	0	0	0	0	0	0
CaS4	Polyplebeiu	2	0	0	0	0	0	0	0
ChS5	Polyplebeiu	2	1	0	0	0	0	0	1
ZaD1	Polyplebeiu	2	1	0	0	0	0	0	1
ZaD3	Polyplebeiu	2	1	0	0	1	1	0	3
ZaO2	Polyplebeiu	2	1	1	1	1	0	0	4
ZaS3	Polyplebeiu	2	1	1	1	1	1	0	5
EnS4	Polyplesios	2	1	1	1	0	0	0	3
ZaS4	Polypuberul	2	0	0	0	0	0	0	0
CaO4	Polypuberul	2	0	0	0	0	0	0	0
PaO1	Proscochlea	2	0	0	0	0	0	0	0
PaD1	Proscochlea	2	0	0	0	1	0	0	1
CaO5	Prosvitelli	2	0	0	0	0	0	0	0
EnS4	Prosvitelli	2	0	0	1	0	0	0	1
EnO4	Prosvitelli	2	0	0	1	1	0	0	2
EnS5	Prosvitelli	2	0	0	1	1	1	0	3
CaO2	Psilcomplan	2	0	0	0	0	0	0	0
ChO1	Rhipbaccife	2	0	0	0	0	0	0	0
PaS1	Rhipbaccife	2	0	0	0	0	0	0	0
PaO2	Rhipbaccife	2	0	0	0	1	0	0	1
PaO5	Rhynehrenbe	2	0	0	0	0	0	0	0
PaD1	Rhynglauca	2	0	0	1	1	1	0	3
ChD2	Scap1000sp1	2	0	0	0	0	0	0	0
ChD5	Scap1000sp1	2	0	0	1	0	0	0	1
ChO5	Scap1000sp1	2	0	1	0	0	0	0	1
PaO1	Scaplivida	2	0	0	0	0	0	0	0
ZaD5	Scolensifor	2	0	0	0	0	0	0	0
MaD4	Selegrandif	2	0	0	0	0	0	0	0
PaS3	Selegrandif	2	0	0	0	0	0	0	0
PaO3	Selegrandif	2	0	0	1	0	0	0	1
ZaS5	Serpfalcari	2	0	0	0	0	0	0	0
ChD1	Serptriseri	2	0	0	0	0	0	0	0
ChD5	Serptriseri	2	0	0	1	0	0	0	1
EnD3	Sola2500sp1	2	0	0	0	0	0	0	0
PaO3	Specdigital	2	0	0	0	0	0	0	0
PaO4	Stelemargin	2	0	0	0	0	0	0	0
ZaO2	Steloaxacan	2	0	0	0	1	0	0	1
ZaS5	Stenprionod	2	0	0	0	0	0	0	0
CaD1	Syng1500sp1	2	0	0	0	0	0	0	0
CaO1	Syng1500sp1	2	0	0	0	0	0	0	0
CaO3	Syng1500sp1	2	0	0	0	0	0	0	0
ChD1	Syngneglect	2	0	0	0	0	0	0	0
ChO1	Syngneglect	2	0	0	0	0	0	0	0
ChO3	Syngneglect	2	0	0	0	0	0	0	0
PaD1	Syngneglect	2	0	0	0	0	0	0	0
PaD2	Syngneglect	2	0	0	0	0	0	0	0
ChD3	Till1000sp1	2	0	0	0	0	0	0	0
ChS2	Till1000sp1	2	0	0	0	0	0	0	0
ZaD2	Till2000sp1	2	1	0	0	0	0	0	1
EnS2	Till2500sp1	2	0	0	0	0	0	0	0
PaD2	Tillbrachyc	2	0	0	0	0	0	0	0
PaD4	Tillbrachyc	2	0	0	0	0	0	0	0
CaS2	Tillbutzii	2	0	0	0	0	0	0	0
CaD2	Tillbutzii	2	0	0	0	1	0	0	1
CaO1	Tillbutzii	2	0	0	0	1	0	0	1
CaO4	Tillbutzii	2	0	0	1	0	1	0	2
CaD5	Tillbutzii	2	0	0	1	1	0	0	2
MaO3	Tillcircinn	2	0	0	0	1	0	0	1
MaS4	Tillcircinn	2	0	0	1	0	0	0	1
MaD1	Tillcircinn	2	0	1	0	0	0	0	1
MaD2	Tillcircinn	2	0	0	0	1	1	0	2
MaD3	Tillconcolo	2	0	0	0	0	0	0	0
ChS4	Tillfilifol	2	0	0	0	0	0	0	0
PaD4	Tillfilifol	2	0	0	0	0	0	0	0
PaO1	Tillfilifol	2	0	0	0	0	0	0	0
PaD2	Tillfilifol	2	0	0	0	1	0	0	1
PaD2	Tillfoliosa	2	0	0	0	0	0	0	0
PaD3	Tillfoliosa	2	0	0	0	0	0	0	0
EnO5	Tillgymnobo	2	0	0	0	0	0	0	0
ZaS4	Tillgymnobo	2	0	0	0	0	0	0	0
ZaS5	Tillgymnobo	2	0	0	0	0	0	0	0
ZaD2	Tillgymnobo	2	0	0	0	1	0	0	1
ZaD3	Tillgymnobo	2	0	0	1	1	1	0	3
EnO2	Tillimperia	2	0	0	0	0	0	0	0
ZaO2	Tillimperia	2	0	0	0	0	0	0	0
ZaS2	Tillimperia	2	0	0	0	0	0	0	0
EnD1	Tillimperia	2	0	0	1	1	0	0	2
PaO3	Tillionanth	2	0	0	0	0	0	0	0
PaO4	Tillionanth	2	0	0	0	0	0	0	0
MaD3	Tillionanth	2	0	0	0	1	0	0	1
PaO1	Tillionanth	2	0	0	0	1	0	0	1
MaD4	Tillionanth	2	0	0	1	0	0	0	1
MaD1	Tillionanth	2	1	1	0	0	0	0	2
ChD3	Tilljuncea	2	0	0	0	0	0	0	0
ChO4	Tilljuncea	2	0	0	0	0	0	0	0
PaO2	Tilljuncea	2	0	0	0	0	0	0	0
PaS2	Tilljuncea	2	0	0	0	0	0	0	0
CaS3	Tilljuncea	2	0	0	0	0	1	0	1
CaS5	Tillkirchho	2	0	0	0	0	0	0	0
CaO1	Tillkirchho	2	0	0	0	1	0	0	1
CaD1	Tillkirchho	2	0	0	0	1	1	1	3
ChS3	Tilllimbata	2	0	0	0	1	0	0	1
ChS1	Tilllimbata	2	0	0	1	0	0	0	1
CaD2	Tillmacrope	2	0	0	0	0	0	0	0
CaO2	Tillmacrope	2	0	0	0	1	0	0	1
ZaD5	Tillmultica	2	0	0	0	1	0	0	1
ChO5	Tillpolysta	2	0	0	0	0	0	0	0
PaO4	Tillpolysta	2	0	0	0	0	0	0	0
PaO5	Tillpolysta	2	0	0	0	0	0	0	0
PaO3	Tillpolysta	2	0	0	0	1	0	0	1
PaO1	Tillpolysta	2	0	0	1	0	0	0	1
PaS5	Tillpolysta	2	0	0	1	0	0	0	1
PaO2	Tillpolysta	2	0	1	0	0	0	0	1
CaD3	Tillpunctul	2	0	0	0	0	0	0	0
CaD1	Tillpunctul	2	0	0	0	0	0	1	1
CaO3	Tillpunctul	2	0	0	0	0	1	0	1
CaD5	Tillpunctul	2	0	0	0	1	1	0	2
PaD4	Tillrecurva	2	0	0	0	0	0	0	0
PaO1	Tillrecurva	2	0	0	0	0	0	0	0
ChD4	Tillschiede	2	0	0	0	0	0	0	0
ChO1	Tillschiede	2	0	0	0	0	0	0	0
PaO1	Tillschiede	2	0	0	0	0	0	0	0
ChO4	Tillschiede	2	0	0	0	1	0	0	1
ChD2	Tillschiede	2	0	0	1	0	0	0	1
PaS1	Tillschiede	2	0	0	1	1	1	0	3
PaO3	Tillstrepto	2	0	0	0	0	0	0	0
PaD1	Tillstrepto	2	0	0	0	1	1	0	2
PaS4	Tilltricolo	2	0	0	0	0	0	0	0
PaD2	Tillutricul	2	0	0	0	0	0	0	0
EnS4	Tillviolace	2	0	0	0	0	0	0	0
CaO3	Tillviridif	2	0	0	0	0	0	0	0
ZaD3	Tillviridif	2	0	0	0	0	0	0	0
CaD1	Tillviridif	2	0	0	0	1	0	0	1
EnD2	Tric2500sp1	2	0	0	0	0	0	0	0
EnO1	Tric2500sp1	2	0	0	0	0	0	0	0
PaS3	Tric500sp1	2	0	0	0	0	1	0	1
CaD1	Triccapilla	2	0	0	0	0	0	0	0
CaD4	Triccapilla	2	0	0	0	0	0	0	0
CaO2	Triccapilla	2	0	0	0	0	0	0	0
CaO5	Triccapilla	2	0	0	0	0	0	0	0
CaS1	Triccapilla	2	0	0	0	0	0	0	0
CaS3	Triccapilla	2	0	0	0	0	0	0	0
CaS4	Triccapilla	2	0	0	0	0	0	0	0
ChD3	Tricstramin	2	0	0	0	0	0	0	0
ChD4	Tricstramin	2	0	0	0	0	0	0	0
ChO1	Tricstramin	2	0	0	0	0	0	0	0
PaD1	Tricstramin	2	0	0	0	0	0	0	0
PaD3	Tricstramin	2	0	0	0	0	0	0	0
PaD4	Tricstramin	2	0	0	0	0	0	0	0
PaO5	Tricstramin	2	0	0	0	0	0	0	0
EnS2	Vittgramini	2	0	0	0	0	0	0	0
ZaD4	Vittgramini	2	0	0	1	0	0	0	1
PaO4	Anthpodophy	3	0	0	0	0	0	0	0
PaS1	Anthschlech	3	0	0	0	0	0	0	0
PaD2	Anthschlech	3	0	0	0	1	0	0	1
CaD5	Asplharpeod	3	0	0	0	0	0	0	0
CaO4	Asplharpeod	3	0	0	0	0	0	0	0
CaD3	Camp1500sp1	3	0	0	1	0	0	0	1
EnS2	Campamphost	3	0	1	0	0	0	0	1
ChS1	Catainteger	3	0	0	0	0	0	0	0
ZaS5	Catopanicul	3	0	0	0	1	1	0	2
ZaS3	Catopanicul	3	0	0	1	0	1	0	2
CaD4	Catosessili	3	0	0	0	0	0	0	0
CaS1	Catosessili	3	0	0	0	0	0	0	0
PaD2	Catosessili	3	0	0	0	0	0	0	0
PaO3	Catosessili	3	0	0	0	1	1	0	2
PaD5	Catosessili	3	0	0	1	1	0	0	2
EnO2	Dendarboreu	3	0	0	0	0	0	0	0
EnD3	Dendarboreu	3	0	0	0	1	0	0	1
CaS1	Didyreptans	3	0	0	0	0	0	0	0
CaO2	Elaplonchop	3	0	0	0	0	0	0	0
ZaD1	Elapsartori	3	0	0	0	0	0	0	0
PaD2	Epipphyllan	3	0	0	0	0	0	0	0
EnO5	Eric2500sp1	3	0	0	1	1	0	0	2
ChD1	Gonifurfura	3	0	0	0	0	0	0	0
ZaS4	Hymefucoide	3	0	0	0	0	0	0	0
ZaO1	Hymepolyant	3	1	0	0	0	0	0	1
ZaO2	Isocunilate	3	0	0	0	1	0	0	1
ChS3	Laelanceps	3	0	0	0	0	0	0	0
ZaO1	Leph2000sp1	3	0	0	0	1	0	0	1
CaO5	Melppilosis	3	0	1	0	0	0	0	1
CaO1	Melpxiphopt	3	0	0	0	0	0	0	0
CaO2	Melpxiphopt	3	0	0	0	0	0	0	0
PaD1	Micrnitida	3	0	1	1	0	0	0	2
ChD5	Peclatra	3	0	0	0	0	0	0	0
PaO5	Peclatra	3	0	0	0	0	0	0	0
ChD1	Pecldispers	3	0	0	0	0	0	0	0
EnS1	Peclhartweg	3	0	0	0	0	0	0	0
EnO2	Peclliebman	3	0	0	0	1	0	0	1
EnD1	Peclliebman	3	0	0	1	1	0	0	2
CaO3	Pecllongepi	3	0	0	0	0	0	0	0
ZaS2	Pecllongepi	3	0	0	1	1	1	0	3
ZaS1	Pepearboric	3	0	0	0	0	0	0	0
ZaS4	Pepearboric	3	0	0	0	0	0	0	0
ZaS5	Pepearboric	3	0	0	0	0	0	0	0
ZaS3	Pepearboric	3	1	0	0	0	0	0	1
CaO4	Pepeberland	3	0	0	0	0	0	0	0
CaS4	Pepeberland	3	0	0	0	0	0	0	0
PaO5	Pepeobtusif	3	0	0	0	1	1	0	2
PaO3	Pepequadrif	3	0	0	0	0	0	0	0
CaO5	Pepequadrif	3	0	0	0	0	0	0	0
ZaD5	Pepequadrif	3	1	0	1	1	0	0	3
CaO4	Pepesanjose	3	0	0	0	0	0	0	0
EnO5	Pepetenerri	3	0	0	1	1	0	0	2
CaD1	Philadvena	3	0	0	0	0	0	0	0
PaO3	Philradiatu	3	0	0	0	0	0	0	0
ChO4	Philsagitti	3	0	0	0	0	0	0	0
ZaS3	Phleareolat	3	0	0	0	0	0	0	0
CaO2	Phleareolat	3	0	0	0	0	0	0	0
CaS4	Phleareolat	3	0	0	0	0	0	0	0
CaO3	Phleareolat	3	0	0	0	0	1	0	1
CaD3	Pleoangusta	3	0	0	0	0	0	0	0
CaD4	Pleoangusta	3	0	0	0	0	0	0	0
CaS2	Pleoangusta	3	0	0	0	0	0	0	0
CaO2	Pleoangusta	3	0	0	0	0	1	0	1
CaO3	Pleoangusta	3	0	0	0	1	0	0	1
CaS4	Pleoangusta	3	0	0	0	1	0	0	1
CaS2	Pleocrassin	3	0	0	0	0	0	0	0
CaS5	Pleocrassin	3	0	0	0	0	1	0	1
ZaS2	Pleomexican	3	0	0	0	0	0	0	0
ZaS5	Pleomexican	3	0	0	0	1	0	0	1
ZaD2	Pleomexican	3	0	0	1	1	0	0	2
ZaS3	Pleomexican	3	0	1	0	1	1	1	4
EnO2	Pleop.inter	3	0	0	0	0	0	0	0
EnS1	Pleop.inter	3	0	0	0	0	0	0	0
EnO4	Pleop.inter	3	0	0	0	1	0	0	1
EnO3	Pleop.inter	3	0	0	1	0	0	0	1
EnD3	Pleop.inter	3	0	0	1	1	0	0	2
CaO2	Pleop.polyl	3	0	0	0	0	0	0	0
EnD3	Pleoplebeia	3	0	0	0	0	0	0	0
EnS2	Pleoplebeia	3	0	0	0	0	0	0	0
EnS3	Pleoplebeia	3	1	1	1	0	1	0	4
ZaO1	Pleu2000sp1	3	0	0	0	0	0	0	0
CaS2	Poly1500sp2	3	0	0	0	0	0	0	0
PaS3	Polyfurfura	3	0	0	0	0	1	0	1
PeD1	Polyhartweg	3	0	1	0	0	0	0	1
PeO5	Polyhartweg	3	1	0	0	0	0	0	1
EnD5	Polyplebeiu	3	0	0	0	0	0	0	0
EnS5	Polyplebeiu	3	0	0	0	0	0	0	0
ZaD4	Polyplebeiu	3	0	0	0	0	0	0	0
ZaD5	Polyplebeiu	3	0	0	0	0	0	0	0
ZaD2	Polyplebeiu	3	0	0	0	0	1	0	1
ZaS5	Polyplebeiu	3	0	0	0	1	0	0	1
CaS1	Polyplebeiu	3	0	0	0	1	0	0	1
EnO3	Polyplebeiu	3	0	1	1	0	0	0	2
EnO1	Polyplesios	3	0	0	0	0	0	0	0
CaS3	Polypuberul	3	0	0	0	0	0	0	0
ChO1	Proscochlea	3	0	0	0	0	0	0	0
EnO5	Prosvitelli	3	0	0	0	0	0	0	0
EnD3	Prosvitelli	3	0	0	0	1	0	0	1
EnO2	Rhynehrenbe	3	0	0	0	0	0	0	0
ChO1	Scap1000sp1	3	0	0	1	0	1	0	2
PaS1	Selegrandif	3	0	0	0	0	0	0	0
EnS5	Serpfalcari	3	0	1	0	0	0	0	1
ZaS1	Serpfalcari	3	1	0	0	0	0	0	1
ZaO1	Serpfalcari	3	0	0	1	1	0	0	2
ChD3	Serptriseri	3	0	0	0	0	0	0	0
ZaD1	Till2000sp1	3	0	0	0	0	0	0	0
ZaD5	Till2000sp1	3	0	0	0	0	0	0	0
ZaS3	Till2000sp1	3	0	0	0	0	0	0	0
ZaS5	Till2000sp1	3	0	0	1	0	0	0	1
PaD5	Tillbrachyc	3	0	0	0	1	0	0	1
PaO1	Tillbrachyc	3	0	0	0	1	0	0	1
CaS3	Tillbutzii	3	1	0	1	0	0	0	2
MaS1	Tillcircinn	3	0	0	0	0	0	0	0
MaO2	Tillcircinn	3	0	0	0	1	1	1	3
MaO4	Tillcircinn	3	0	0	1	1	1	0	3
PaS1	Tillfoliosa	3	0	0	0	0	0	0	0
EnD2	Tillgymnobo	3	0	0	0	0	0	0	0
EnO3	Tillgymnobo	3	0	0	1	1	1	0	3
ZaS5	Tillimperia	3	0	0	0	0	1	0	1
ZaD1	Tillimperia	3	0	0	0	1	0	0	1
EnO3	Tillimperia	3	0	0	0	1	1	0	2
ChS5	Tillionanth	3	0	0	0	0	0	0	0
MaD2	Tillionanth	3	0	0	0	0	0	0	0
PaS4	Tillionanth	3	0	0	1	1	1	0	3
PaD5	Tillionanth	3	0	1	1	1	0	0	3
ChS5	Tilljuncea	3	0	0	0	0	0	0	0
PaD1	Tilljuncea	3	0	0	1	0	0	0	1
PaS4	Tilljuncea	3	0	1	0	0	0	0	1
PaS1	Tilljuncea	3	0	0	0	1	1	0	2
PaS3	Tilljuncea	3	0	0	1	1	0	0	2
CaS2	Tillkirchho	3	0	0	0	0	0	0	0
CaD5	Tillkirchho	3	0	0	0	1	0	0	1
CaD2	Tillkirchho	3	0	0	0	1	1	0	2
CaS3	Tillkirchho	3	0	0	1	0	1	0	2
PaS3	Tilllimbata	3	0	0	0	1	0	0	1
ChS2	Tilllimbata	3	0	0	1	1	0	0	2
PaD1	Tilllimbata	3	0	0	1	1	1	0	3
CaS2	Tillmultica	3	0	0	0	0	0	0	0
CaD2	Tillmultica	3	0	0	0	1	0	0	1
CaD5	Tillmultica	3	0	0	0	1	0	0	1
CaD3	Tillmultica	3	0	0	1	1	1	0	3
ChS3	Tillpolysta	3	0	0	0	0	0	0	0
PaS2	Tillpolysta	3	0	0	0	1	0	0	1
CaD2	Tillpunctul	3	0	0	0	0	0	0	0
PaD2	Tillrecurva	3	0	0	0	0	0	0	0
PaO2	Tillrecurva	3	0	0	0	0	0	0	0
PaD2	Tillschiede	3	0	0	0	1	0	0	1
PaS4	Tillschiede	3	0	0	1	1	1	0	3
PaS3	Tillstrepto	3	0	0	0	1	0	0	1
PaD2	Tillstrepto	3	0	0	0	1	1	0	2
CaO5	Tillviridif	3	0	0	0	0	0	0	0
CaO3	Triccapilla	3	0	0	0	0	0	0	0
ZaO1	Vittgramini	3	0	0	0	0	0	0	0
PaD2	Campphyllit	4	0	0	0	0	0	0	0
PaO4	Campphyllit	4	0	0	1	0	1	0	2
PaD1	Catomorreni	4	0	0	0	0	0	0	0
PaO4	Catomorreni	4	0	0	0	0	1	1	2
CaD5	Catosessili	4	0	0	0	0	0	0	0
CaS5	Catosessili	4	0	0	0	0	0	0	0
ZaO1	Elappetiola	4	0	1	0	0	0	0	1
CaO3	Elapvestitu	4	0	0	0	1	0	0	1
ChO2	Laelanceps	4	0	0	0	0	0	0	0
CaO2	Orch1500sp2	4	0	0	0	0	0	0	0
EnS2	Pecl2500sp1	4	0	0	1	1	0	0	2
ChO2	Peclatra	4	0	0	0	0	0	0	0
PaD1	Peclatra	4	0	0	0	0	0	0	0
PaO4	Pecldivaric	4	0	0	0	0	0	0	0
PaD1	Pepeobtusif	4	0	0	0	0	0	0	0
PaO3	Pepeobtusif	4	0	0	0	1	0	0	1
PaO1	Pepeobtusif	4	0	1	0	0	0	0	1
ZaO1	Pepequadrif	4	0	0	1	1	0	0	2
ZaO1	Pepetenerri	4	0	0	0	0	0	0	0
ChO1	Philsagitti	4	0	0	0	0	0	0	0
CaS3	Pleoangusta	4	0	0	0	0	0	0	0
CaD5	Pleocrassin	4	0	0	0	0	0	0	0
CaS3	Pleocrassin	4	0	0	0	0	0	0	0
CaS1	Pleocrassin	4	0	0	0	1	0	0	1
CaO2	Pleocrassin	4	0	0	1	0	1	0	2
EnD5	Pleop.inter	4	0	0	0	0	0	0	0
EnS4	Pleop.inter	4	1	0	0	0	0	0	1
EnD1	Pleoplebeia	4	0	0	0	0	0	0	0
EnS1	Pleoplebeia	4	0	1	1	0	0	0	2
PaS5	Polyfurfura	4	0	0	1	1	0	0	2
ZaO1	Polyplebeiu	4	0	0	1	1	1	0	3
EnD4	Polyplebeiu	4	0	1	1	1	0	0	3
CaS3	Polypolypod	4	0	0	0	0	0	0	0
PaD2	Rhipbaccife	4	0	0	0	0	1	0	1
ChS1	Syngneglect	4	0	0	0	0	0	0	0
ChS2	Syngneglect	4	0	0	0	0	0	0	0
ChS1	Till1000sp1	4	0	0	1	0	0	0	1
CaS1	Tillbutzii	4	0	0	0	1	0	0	1
CaS5	Tillbutzii	4	0	0	0	1	0	0	1
EnD3	Tillgymnobo	4	0	0	0	0	0	0	0
ChD1	Tillionanth	4	0	0	0	0	0	0	0
PaD1	Tillionanth	4	0	0	1	0	0	1	2
ChS3	Tillionanth	4	0	0	0	1	1	0	2
PaD2	Tillionanth	4	0	0	0	1	1	0	2
PaO3	Tilljuncea	4	0	0	1	1	0	0	2
CaD4	Tillkirchho	4	0	0	0	0	0	0	0
CaO2	Tillkirchho	4	0	0	0	0	0	0	0
CaS1	Tillkirchho	4	0	0	0	1	0	0	1
CaD5	Tillmacrope	4	0	0	0	0	0	0	0
CaD1	Tillmacrope	4	0	1	0	1	0	0	2
CaS5	Tillmultica	4	0	0	0	0	1	0	1
CaD4	Tillmultica	4	0	0	0	1	0	0	1
CaS1	Tillmultica	4	0	0	0	1	0	0	1
CaS4	Tillmultica	4	0	0	0	1	0	0	1
CaS3	Tillmultica	4	0	0	1	0	0	0	1
CaD1	Tillmultica	4	0	0	0	1	1	0	2
PaD1	Tillrecurva	4	0	0	0	0	0	0	0
PaO3	Tillrecurva	4	0	0	0	0	0	0	0
ChD1	Tillschiede	4	0	0	0	0	0	0	0
PaO4	Tillschiede	4	0	0	0	0	1	0	1
ChS2	Tillschiede	4	0	0	0	1	0	0	1
ChO5	Tillschiede	4	0	0	1	0	0	0	1
PaS2	Tillschiede	4	0	1	0	0	0	0	1
ChO2	Tillschiede	4	0	0	1	1	1	0	3
ZaD2	Tillviridif	4	0	1	1	1	0	0	3
CaD2	Triccapilla	4	0	0	0	0	0	0	0
CaD3	Triccapilla	4	0	0	0	0	0	0	0
